1 The *Staphylococcus aureus* iron-regulated surface determinant A (IsdA) increases SARS  
2 CoV-2 replication by modulating JAK-STAT signaling

3 Mariya I. Goncheva<sup>1\*</sup>, Richard M. Gibson<sup>3</sup>, Ainslie C. Shouldice<sup>1</sup>, Jimmy D. Dikeakos<sup>1</sup>, David  
4 E. Heinrichs<sup>1\*</sup>

5 1. Department of Microbiology and Immunology, University of Western Ontario, London,  
6 Ontario, Canada N6A 5C1

7 2. ImPaKt Laboratory, Schulich School of Medicine and Dentistry, University of Western  
8 Ontario, London, Ontario, Canada N6A 5C1

9 \*Co-corresponding authors:

10 Mariya I. Goncheva, Department of Microbiology and Immunology, University of Western  
11 Ontario, London, Ontario, Canada N6A 5C1, email: mariyagoncheva@uvic.ca

12 David E. Heinrichs, Department of Microbiology and Immunology, University of Western  
13 Ontario, London, Ontario, Canada N6A 5C1, email: deh@uwo.ca

14

15 **Abstract**

16 The emergence and spread of Severe Acute Respiratory Syndrome Coronavirus 2 (SARS  
17 CoV-2) and the associated Coronavirus disease (COVID-19) pandemic have affected  
18 millions globally. Like other respiratory viruses, a significant complication of COVID-19  
19 infection is secondary bacterial co-infection, which is seen in approximately 25% of severe  
20 cases. The most common organism isolated from co-infection is the Gram-positive  
21 bacterium *Staphylococcus aureus*. Here, we developed an *in vitro* co-infection model where  
22 both CoV-2 and *S. aureus* replication kinetics can be examined. We demonstrate CoV-2  
23 infection does not alter how *S. aureus* attaches to or grows in host epithelial cells. In  
24 contrast, the presence of replicating *S. aureus* enhances the replication of CoV-2 by 10-15-  
25 fold. We identify this pro-viral activity is due to the *S. aureus* iron-regulated surface  
26 determinant A (IsdA) and this effect is mimicked across different SARS CoV-2 permissive  
27 cell lines infected with multiple viral variants. Analysis of co-infected cells demonstrated an  
28 IsdA dependent modification of host transcription. Using chemical inhibition, we determined  
29 *S. aureus* IsdA modifies host Janus Kinase – Signal Transducer and Activator of  
30 Transcription (JAK-STAT) signalling, ultimately leading to increased viral replication. These  
31 findings provide key insight into the molecular interactions that occur between host cells,  
32 CoV-2 and *S. aureus* during co-infection.

33 **Importance**

34 Bacterial co-infection is a common and significant complication of respiratory viral infection,  
35 including in patients with COVID-19, and leads to increased morbidity and mortality. The  
36 relationship between virus, bacteria and host is largely unknown, which makes it difficult to  
37 design effective treatment strategies. In the present study we created a model of co-infection  
38 between SARS CoV-2 and *Staphylococcus aureus*, the most common species identified in  
39 COVID-19 patients with co-infection. We demonstrate that the *S. aureus* protein IsdA  
40 enhances the replication of SARS CoV-2 *in vitro* by modulating host cell signal transduction  
41 pathways. The significance of this finding is in identifying a bacterial component that  
42 enhances CoV-2 pathogenesis, which could be a target for the development of co-infection  
43 specific therapy in the future. In addition, this protein can be used as a tool to decipher the  
44 mechanisms by which CoV-2 manipulates the host cell, providing a better understanding of  
45 COVID-19 virulence.

46

## 47 **Introduction**

48 In December 2019, reports emerged of a pneumonia-like illness in the city of Wuhan, China.  
49 The disease was attributed to a novel coronavirus – Severe Acute Respiratory Syndrome  
50 Coronavirus 2, (SARS CoV-2, CoV-2)(1, 2) and, on March 11<sup>th</sup>, 2020, the WHO had  
51 declared this a global pandemic(3). CoV-2 infection, referred to as the COVID-19 disease,  
52 results in respiratory symptoms of varying severity, often including cough and fever(3). To  
53 date, there have been more than 541 million confirmed cases of COVID-19 worldwide, and  
54 over 6.3 million deaths (as of June 2022). Outside of vaccination (4, 5), treatment options for  
55 COVID-19 infections remain somewhat limited, and predominately focused on preventing  
56 death in severe, hospitalized patients.

57 One significant complication of respiratory viral infections, including CoV-2, is increased  
58 susceptibility to secondary bacterial infections. Although frequency of co-infection varies  
59 between reports and locations(6–8), the overall rate in the general population is roughly  
60 5%(9). However, incidence jumps to 25-30% of hospitalized patients, and is as high as 40%  
61 in intensive care unit (ICU) patients(7, 9–11). Importantly, the mortality of CoV-2 and  
62 bacteria co-infected patients can be as high as 35%, despite the almost universal  
63 administration of antibiotics(6, 9). At present, no studies have examined the molecular  
64 interactions that occur between the two pathogens during co-infection and how that may  
65 impact disease outcome.

66 Data from patients infected with CoV-2, and with laboratory confirmed bacterial co-infection,  
67 show the most commonly isolated species to date has been the Gram-positive opportunistic  
68 pathogen *Staphylococcus aureus*. Prevalence of *S. aureus* varies between studies, with  
69 reports ranging from 35-70% of isolates being *S. aureus*, with both methicillin sensitive  
70 (MSSA) and methicillin resistant (MRSA) isolates reported in most studies(6, 9–11).  
71 However, despite the abundance of *S. aureus* co-infection in COVID-19 patients, little is  
72 known about how or if the virus and bacteria affect each other, and what effect this may  
73 have on pathogenesis.

74 In previous studies with other respiratory viruses, *S. aureus* has also been shown as a  
75 frequent cause of secondary bacterial co-infection(12, 13). In the case of influenza A virus  
76 (IAV), several studies have demonstrated co-infection results in more severe immune  
77 system dysregulation(13–15), including depletion of alveolar macrophages. Non-immune  
78 mediated interactions have also been characterised at the molecular level(16–18) - IAV  
79 infection results in increased adhesion of both *S. aureus* and *Streptococcus pneumoniae* to  
80 epithelial cells and, in the case of *S. aureus*, increased intracellular bacterial replication(18).  
81 Conversely, the *S. aureus* protein lipase 1 enhances IAV replication in primary cells through

82 the positive modulation of infectious particle release(19). Based on the similarity of clinical  
83 presentation and co-infection frequency, we reasoned events during co-infection will be  
84 similar between IAV – *S. aureus* co-infection and CoV-2 – *S. aureus* co-infection. In the  
85 present study, we investigated the interplay between CoV-2 and *S. aureus* and demonstrate  
86 that *S. aureus* enhances the replication of CoV-2 *in vitro* through the bacterial iron regulated  
87 surface determinant protein A (IsdA). The expression of IsdA leads to a modification of  
88 Janus Kinase – Signal Transducer and Activator of Transcription (JAK-STAT) signalling in  
89 CoV-2 infected cells, which positively regulates viral replication.

## 90 **Results**

### 91 ***S. aureus* enhances the replication of CoV-2 in epithelial cells**

92 Previous reports have indicated that infection with IAV results in increased adhesion to and  
93 replication of *S. aureus* in epithelial cells(18). Based on these findings, we sought to  
94 determine if infection of cells with CoV-2 also affects adhesion of *S. aureus*. To do this, we  
95 developed an *in vitro* co-infection model where the replication kinetics of both pathogens  
96 could be quantified (outlined in Figure 1A). We used the Wuhan isolate of CoV-2, the MRSA  
97 strain USA300 LAC and a bacterial mutant lacking fibronectin binding proteins (FnbAB), the  
98 latter proteins being required for invasion of *S. aureus* into epithelial cells(20, 21). We  
99 observed that *S. aureus* efficiently adheres to Vero E6 cells (Figure 1B), whereas a  
100 preceding CoV-2 infection did not impact bacterial adhesion (Figure 1B, Supplementary  
101 Figure 1A, 1B). Further, *S. aureus* was able to invade into Vero E6 cells, and this was  
102 dependent on the presence of FnbAB (Figure 1B), as previously shown for other epithelial  
103 cells(20–22). However, no differences in invasion rates were observed between cells alone  
104 and CoV-2 infected cells (Figure 1B, Supplementary Figure 1C). Since bacterial invasion  
105 was equivalent between uninfected and CoV-2 infected cells, we next tested if preceding  
106 viral infection impacts the subsequent rate of intracellular bacterial replication. To test this,  
107 we examined bacterial numbers at 6h, 8h and 20h post invasion. As shown in Figure 1C,  
108 bacterial replication occurs, as demonstrated by increased bacterial numbers over time.  
109 However, the rate of bacterial replication, and the absolute level to which the bacteria grew,  
110 did not differ between cells alone and CoV-2 infected cells. When CoV-2 titre was  
111 determined, we observed that the presence of *S. aureus* increased the amount of infectious  
112 virus particles, at both 12h and 24h post infection (Figure 1D). Taken together, these data  
113 indicate that CoV-2 infection does not overtly impact the interaction of *S. aureus* with  
114 epithelial cells, but that *S. aureus* enhances CoV-2 replication in Vero E6 epithelial cells.

115 Given that the model employed in Figure 1A demonstrated that *S. aureus* enhances virus  
116 replication, it's tempting to hypothesize that CoV-2 and *S. aureus* have replicated in the

117 exact same cell. To determine if this is the case, we simplified the model and excluded  
118 bacterial invasion (Figure 1E). We added  $1 \times 10^5$  CFUs of WT or the invasion incapable  
119 *ΔfnbAB S. aureus* mutant, the approximate amount detected to become intracellular in Vero  
120 E6 cells (see Figure 1B), to the culture medium of infected cells. Using this method, we  
121 observed the same, ~10-fold increase in viral titre (Figure 1F), demonstrating that bacterial  
122 invasion is not needed, and the addition of *S. aureus* to the extracellular environment is  
123 sufficient for increased virus replication to occur.

124 Next, we sought to determine if the presence of *S. aureus* cells is enough to enhance CoV-2  
125 growth, and if the bacteria even need to be alive. We examined virus replication in the  
126 presence of WT *S. aureus*, or the equivalent number of heat-killed bacteria. While the WT  
127 bacteria enhanced virus growth by ~10-fold, no effect was observed in the presence of heat-  
128 killed bacteria (Figure 1G). Concurrently, we observed that the WT bacteria grew by over 2-  
129 log in the 24h period of the experiment (Figure 1H). Furthermore, when we examined  
130 additional strains of *S. aureus*, including an avirulent laboratory strain RN4220, we saw  
131 equivalent levels of pro-viral activity (Figure 1I) and bacterial replication (Figure 1J),  
132 demonstrating this effect is not restricted to USA300. Based on these findings, we reasoned  
133 the pro-viral activity is due to either an increase in the number of bacteria over the 24h, or to  
134 a factor produced during bacterial growth. To test the latter option, we added cell free  
135 supernatant of stationary phase WT *S. aureus* to CoV-2 infected cells. This supernatant  
136 contains a large number of proteins, including enzymes, virulence factors, and other by-  
137 products of bacterial replication. Indeed, we observed that the supernatant alone was  
138 sufficient to increase CoV-2 replication (Figure 1K), albeit not to levels observed with the  
139 whole bacteria. To determine if the bacterial pro-viral factor is a protein, we treated the  
140 supernatant with the broad-spectrum protease trypsin, which resulted in degradation of  
141 observable polypeptides (Supplementary Figure 2). This treatment also eliminated the pro-  
142 viral phenotype (Figure 1K), demonstrating that CoV-2 replication is enhanced by a *S.*  
143 *aureus* protein or proteins that are present in the bacterial supernatant.

#### 144 **The *S. aureus* iron regulated surface determinant A (IsdA) mediates the bacterial pro-** 145 **viral activity**

146 Considering we had observed the pro-viral phenotype with both virulent and avirulent *S.*  
147 *aureus* strains and shown cell-free supernatant was sufficient for this activity, we  
148 hypothesised a protein or proteins that are secreted or released by the *S aureus* cell are  
149 responsible. To test this, we employed bacterial mutants, lacking one or more of the key *S.*  
150 *aureus* proteins normally found in the bacterial supernatant and added them to virus infected  
151 cells (as in Figure 1E). As shown in Figure 2A, all these mutants retained pro-viral activity,

152 with the exception of the mutant in sortase A (*srtA*). Sortase A is an endopeptidase that  
153 covalently links the group of proteins known as “cell-wall anchored” (CWA) proteins to the  
154 peptidoglycan of a bacterial cell, resulting in their display on the cell surface(23, 24).  
155 However, many of these proteins are subsequently digested by proteases and released in  
156 the bacterial supernatant. To confirm the role of sortase A, we complemented the bacterial  
157 mutant by providing the full-length genes *in trans* on a plasmid. As shown in Figure 2B,  
158 complementation successfully restored the pro-viral phenotype, without impacting bacterial  
159 replication of these strains (Figure 2C).

160 In the absence of sortase A, CWA proteins are still produced, but are instead directly  
161 secreted into the bacterial supernatant(23, 24); we also noticed that only partial elimination  
162 of pro-viral activity is seen with the *srtA* mutant. Taken together, these findings suggest that  
163 virus replication is enhanced by one of the proteins anchored by sortase A, rather than the  
164 sortase itself. To test this hypothesis, we took individual mutants of each of the 18 proteins  
165 encoded in the strain USA300 (except *fnbAB* and *spa sbi*, where double mutants were  
166 used), and tested them for pro-viral activity. As shown in Figure 2D, all but three of these  
167 mutants retained pro-viral activity – *isdA*, *isdB* and *sdrC*. To determine the role of these 3  
168 genes, we complemented each mutant by providing the full-length genes *in trans* on a  
169 plasmid and re-tested them for pro-viral activity. Only provision of *isdA* restored the  
170 phenotype (Figure 2E), even though all strains grew to the same level (Figure 2F). Of note,  
171 we also observed that complementation of *isdA* resulted in increased secretion of the protein  
172 in the bacterial supernatant and restoration of LsdA detection on the bacterial cell surface  
173 (Supplementary Figure 3). However, we were unable to confirm the same for LsdB and SdrC  
174 due to the unavailability of antibodies. Therefore, the role of these two proteins should not be  
175 ruled out as potential further factors enhancing CoV-2.

176 As we had previously observed secreted bacterial proteins were sufficient for pro-viral  
177 activity, we sought to determine whether recombinant LsdA can enhance CoV-2 replication  
178 on its own. Indeed, we observed that when rLsdA was added to virus infected cells a modest,  
179 but still significant increase in viral titre was observed (Figure 2G). This effect was not  
180 present when we employed myoglobin, an eukaryotic protein that, like LsdA, also carries a  
181 heme molecule. Nevertheless, the effect of the recombinant LsdA was not as pronounced as  
182 the whole bacteria, suggesting LsdA shed from the bacteria is different, presumably at least  
183 in the presence of the peptidoglycan it is anchored to. As such, we continued  
184 characterisation of LsdA’s effect on CoV-2 replication using whole bacteria.

185 Having identified at least one bacterial factor responsible for the pro-viral activity on Vero E6  
186 cells, we next sought to determine the scope of the phenotype. We tested bacterial strains

187 on the human lung epithelial A549 cells, which were stably engineered to express ACE2 and  
188 TRMPSS2. Although the presence of WT *S. aureus* did not enhance CoV-2 replication, we  
189 observed higher levels of host cell damage with this cell line, likely due to the activity of  
190 many host-restricted *S. aureus* toxins(25) (Supplementary Figure 3A). Indeed, when we  
191 tested a modified strain that produces only minimal levels of toxins (*agt::tet Δpsm1-4* has  
192 reduced toxin production due to inactivation of a major virulence regulator(26)) we did see  
193 higher viral titre, compared to cells treated with WT *S. aureus* (Supplementary Figure 4A).  
194 Nevertheless, overexpression of *isdA* in the complemented strain of either background  
195 resulted in ~10 fold more virus being produced (Supplementary Figure 4A), despite equal  
196 bacterial replication levels (Supplementary Figure 4B). Although infection of primary human  
197 bronchial-epithelial cells resulted in low levels of infectious virus production by 24h, we  
198 nevertheless still demonstrate an increase in titre when the *isdA* overexpressing strain of *S.*  
199 *aureus* was present (Supplementary Figure 4C, 4D).

200 Furthermore, similar to observations made with the WT (Wuhan) CoV-2 virus, the Delta  
201 variant was also enhanced by *S. aureus* in an *IsdA* dependent manner during infection of  
202 Vero E6 or A549 ACE2 TRMPSS2 cells (Supplementary Figure 4E, 4F). Indeed, we also  
203 detected pro-viral activity for the recombinant *IsdA* protein for the Delta variant, in both Vero  
204 E6 and A549 ACE2 TRMPSS2 cells (Supplementary Figure 5). Overall, these data  
205 demonstrate that *S. aureus* pro-viral activity is mediated through *IsdA*, it is conserved over  
206 different cell types and viral variants, and is retained in a recombinant form of *IsdA*.

### 207 ***S. aureus* IsdA induces specific host transcriptional changes**

208 In order to determine how *S. aureus* and *IsdA* affect CoV-2, we performed an RNAseq  
209 analysis of Vero E6 cells treated with the WT, *isdA::tn* or *isdA::tn pisdA* bacteria (Figure 3A).  
210 To ease data interpretation and eliminate any virus specific effects on the cells, these  
211 experiments were performed in the absence of virus (Figure 3A). Analysis of differentially  
212 regulated genes (DEGs) of samples with bacteria indicated that despite hundreds of DEGs  
213 detected, only 11 genes were in common between the comparisons of WT vs *isdA::tn* and  
214 WT vs *isdA::tn pisdA* (Supplementary File 2, Figure 3B, Table 1). This suggests that the  
215 presence of *isdA* has a specific transcriptional effect on only these genes, and other  
216 changes can be attributed to different *S. aureus* proteins.

217 As our RNAseq analysis did not include CoV-2 infected cells, we sought to determine if any  
218 of the DEG we identified as modified by the presence of *isdA* also display transcriptional  
219 changes during co-infection. Accordingly, we next infected cells with CoV-2 or CoV-2 and *S.*  
220 *aureus* (as detailed in Figure 3C) and extracted host RNA. We quantified transcript levels by  
221 RT-PCR for the genes with highest level of change seen by RNAseq and excluded

222 uncharacterised proteins. We also tested LOC103235349 and PIWIL1, however no  
223 transcript levels were detected. As shown in Figure 3D-G, we saw the presence of *S.*  
224 *aureus* changed the expression of all 4 of the genes tested. However, these changes were  
225 *isdA* dependent in only one case, where we saw WT and *psdA* carrying bacteria decrease  
226 the expression of LOC119626243, while the *isdA::tn* mutant showed expression levels  
227 similar to the virus alone (Figure 3E). The locus is annotated as collagen alpha-1(I) chain-  
228 like protein, and a more detailed bioinformatic analysis identified sequence similarity to the  
229 human Janus Kinase 1 (JAK1) gene. Altogether these data suggest that the presence of  
230 *IsdA* on *S. aureus* cells triggers a specific response in host cells during both bacterial  
231 infection and CoV-2 co-infection, and a JAK1 like gene is one of the key transcripts affected.

### 232 ***S. aureus* IsdA modulates JAK2-STAT3 signalling to enhance CoV-2 replication**

233 Given that we observed significant changes in the transcription of a gene with homology to  
234 JAK1 during co-infection, we decided to investigate the expression of the four JAK genes in  
235 Vero E6 cells. We examined cells at 12h post virus infection, both in the presence and  
236 absence of bacteria, and assessed transcription through RT-PCR. As shown in Figure 4 (A-  
237 D), we observed that co-infection resulted in a small increase in JAK1 transcripts in the  
238 presence of WT *S. aureus*, but no transcriptional changes were observed for JAK2, JAK3 or  
239 TYK2. Furthermore, the effect on JAK1 was not specific to the presence of *isdA*.

240 However, given that JAK-STAT signalling occurs through protein expression and/or post  
241 translational modifications such as phosphorylation, it is unlikely that significant differences  
242 would be seen at the transcript level. Therefore, we further examined the role of the JAK-  
243 STAT pathway at the protein/function level. Effectively, we chose to use chemical inhibition,  
244 as the antibody availability for the cell line used is limited or cross-species reactivity of the  
245 antibodies has not been tested. Pan-JAK inhibitors (CP 690550 citrate, Pyridone 6) at 5 $\mu$ M  
246 decreased CoV-2 replication both in the presence and absence of *S. aureus*, making them  
247 unsuitable for co-infection investigations (data not shown). However, the inhibitor SD1008,  
248 which targets the signal transduction between JAK2 and STAT3(26), eliminated the pro-viral  
249 effect of *S. aureus* without impacting viral replication alone (Figure 4E). Furthermore,  
250 SD1008 inhibition was specific to *S. aureus* expressing *isdA*, suggesting this is at least one  
251 of the mechanism/s through which *IsdA* enhances CoV-2 replication. Importantly, the  
252 presence of the 1 $\mu$ M SD1008 did not impact the ability of *S. aureus* to replicate,  
253 demonstrating the decrease in viral titre was not due to absence of bacterial growth (Figure  
254 4F). In addition, we observed an equivalent inhibition of the *S. aureus* pro-viral effect when  
255 SD1008 was added to cells infected with the Delta variant of CoV-2 (Figure 4 G, H). These  
256 data indicate the activity of the inhibitor, just as we had seen with whole bacteria and



257 recombinant IsdA, is not restricted to a specific viral variant. Taken together, these findings  
258 suggest inhibition of JAK2 and/or STAT3 activation is at least partially responsible for the  
259 IsdA mediated pro-viral effect of *S. aureus*.

## 260 **Discussion**

261 The emergence and spread of SARS CoV-2, and the subsequent COVID-19 pandemic have  
262 demonstrated the devastating effect respiratory viral pathogens can have on human life and  
263 health. Morbidity and mortality of respiratory viruses, both during seasonal outbreaks and  
264 pandemics, are complicated by increased susceptibility of patients to secondary bacterial co-  
265 infection. *S. aureus* has historically been one of the most common organisms identified in  
266 co-infection, especially in the case of influenza; similarly, worldwide data indicates *S. aureus*  
267 is also the most prevalent bacterial species in CoV-2 co-infection patients(9). Strikingly, co-  
268 infection with *S. aureus* can increase mortality from ~0.8% with CoV-2 alone, to as high as  
269 35% during co-infection(9). In COVID-19 patients, work has demonstrated that acute CoV-2  
270 infection and the associated increase in cytokine levels decreases the bacterial killing  
271 capacity of neutrophils and monocytes, therefore contributing to the development of bacterial  
272 co-infection(27). Immune system dysregulation has also been shown to play a significant  
273 role in the pathogenesis of co-infection with influenza, where the immune response skewing  
274 from the initial viral replication creates a pro-bacterial environment in the host(13–15). The  
275 importance of these extreme responses is undeniable for the inability of the host to clear the  
276 infection. However, molecular interactions between viruses and bacteria during co-infection  
277 are relatively unstudied in comparison, due to the requirement for complex models and/or  
278 specific cell types. Here, we demonstrate the identification of the first bacterial protein that  
279 can manipulate the host cell to favour CoV-2 replication. The broad effect of IsdA on different  
280 CoV-2 variants, coupled with the universal presence of this gene in *S. aureus* isolates  
281 suggests the impact of IsdA on co-infection pathogenesis can be significant.

282 Using a co-infection system where the replication kinetics of both pathogens can be  
283 measured, we demonstrated *S. aureus* enhances the ability of CoV-2 to replicate (Figure 1).  
284 These data are similar to observations made with IAV, where *S. aureus* was also pro-  
285 viral(18, 28). In contrast, the presence of the virus provided no benefit to bacterial  
286 attachment or replication. This differs from IAV, where viral infection increased the ability of  
287 *S. aureus* and *S. pneumoniae* to adhere to and invade into host cells(18). The variation in  
288 results between IAV and CoV-2 suggests virus-specific interactions occur with co-infecting  
289 bacteria, even when clinical frequency and presentation are similar.

290 Utilizing bacterial mutants, we were able to identify CoV-2 replication was impacted by the  
291 bacterial protein IsdA (Figure 2). In *S. aureus*, IsdA is part of a network of Isd proteins

292 anchored into the bacterial cell wall, which serves to transport heme iron into the bacterial  
293 cell(29, 30). However, some LsdA and/or LsdA attached to peptidoglycan is released from the  
294 cells as the peptidoglycan layer is renewed. Interestingly, LsdA has been shown to allow *S.*  
295 *aureus* adherence to squamous epithelial cells in the nares(31, 32), and the widespread  
296 expression of the protein during infection has made it an attractive target for inclusion as a  
297 vaccine component(33). To our knowledge, this is the first report of LsdA manipulating host  
298 cell transcription and signal transduction. The effect this has on viral replication is likely an  
299 inadvertent consequence of targeting pathways that could also be beneficial to the bacteria.  
300 LsdA is now the second *S. aureus* protein shown to impact viral replication through host  
301 modulation. However, the previous report of *S. aureus* lipase 1 and IAV identified an effect  
302 specific to primary fibroblast cells(19). In contrast, we see LsdA impacts cellular transcription  
303 and/or signal transduction pathways and can be seen in both primary and immortalised cells.  
304 The observed differences could be due to different approaches, as the effect of lipase 1 on  
305 cell transcription remains unknown. Indeed, we also have not examined how LsdA effects  
306 CoV-2 replication in fibroblast cells, or whether a cumulative effect would be observed if both  
307 proteins are present, and a suitable cell type is used. Nevertheless, the possibility that LsdA  
308 effects are specific to CoV-2 cannot be ruled out, and further studies are necessary to test  
309 LsdA's potential effect on other viruses.

310 Our data indicate *S. aureus* LsdA manipulates the JAK/STAT signalling in the cell, which  
311 ultimately results in the observed pro-viral effect (Figure 3, Figure 4). JAK/STAT signalling  
312 serves to transmit a signal from the cell surface, usually when a molecule is bound, resulting  
313 in phosphorylation of JAK, subsequent phosphorylation of a STAT protein, and eventually  
314 transcriptional changes in the cell. As JAK-STAT signalling is also triggered by binding of  
315 cytokines and chemokines, it is a major path for induction of intrinsic cellular immunity,  
316 including the activation of Interferon stimulated genes(34). Given that immune dysregulation  
317 and "cytokine storms" are a significant contribution to COVID-19 mortality, the concept of  
318 bacterial co-infection further skewing this response can go a long way to explain the high  
319 mortality rates observed in co-infected patients.

320 The central role of JAK/STAT signalling in responding to and inducing immune signals has  
321 made it a target for many virus induced manipulations. Indeed, CoV-2 was recently  
322 demonstrated to downregulate JAK signalling and inhibit the phosphorylation of JAK1 and  
323 Tyk2(35). Assessment of patients has also shown increased STAT1 and phospho-STAT1  
324 levels in peripheral monocytes(36). It would be of great interest to compare if these  
325 responses are further elevated if bacterial co-infection is present. The original SARS CoV  
326 virus also decreases STAT1 phosphorylation through the action of the non-structural protein  
327 1(37), and dephosphorylation of STAT3 is seen during infection of Vero E6 cells(38).

328 Work on other RNA viruses has also shown IAV decreases the phosphorylation of  
329 STAT1(39) and avian infectious bronchitis virus Nsp14 facilitated degradation of JAK1 and  
330 impaired the nuclear translocation of STAT1(40). Furthermore, a study of IAV – *S. aureus*  
331 co-infection also demonstrated *S. aureus* prevents the dimerization of STAT1 and STAT2,  
332 which results in increased IAV replication(28). It will be interesting to determine if this  
333 STAT1-STAT2 dimerization block is mediated by IsdA, or if *S. aureus* produces more than  
334 one protein that can manipulate this pathway. Indeed, the question also remains of the level  
335 of change in JAK and STAT expression and phosphorylation by IsdA, and what benefit this  
336 provides to the bacteria. Nevertheless, we believe IsdA can serve as a tool to further  
337 understand how CoV-2 manipulates the cell during replication, and whether these  
338 mechanisms can be targeted for therapeutic purposes.

339 Overall, our work demonstrates a new link between CoV-2 and co-infecting bacteria, and  
340 indeed one of the first reports of a direct molecular interactions between a coronavirus and  
341 bacteria. The identification of IsdA as a pro-viral factor shows that there is still much that is  
342 unknown about how specific bacterial proteins interact with respiratory viruses. Further  
343 characterisation of such events can provide a simultaneous two-fold advancement of  
344 knowledge, in both co-infection events, and as new tools to study the biology of viruses.

## 345 **Materials and methods**

### 346 Tissue culture

347 African Green Monkey kidney Vero E6 cells were purchased from the ATCC and maintained  
348 in Dulbecco's modified Eagle's medium (DMEM) with 10% (v/v) fetal bovine serum (FBS) at  
349 37°C, 5% CO<sub>2</sub> and passaged twice a week. A549 ACE2 TRMPSS2 cells were a kind gift  
350 from Dr Matthew Miller (McMaster University, Canada), and were maintained in DMEM +  
351 10% w/v FBS, 700µg/ml G418, 800µg/ml hygromycin B and 1%w/v L-Glutamine) at 37°C,  
352 5% CO<sub>2</sub> and passaged twice a week. Primary human bronchio/tracheal epithelial cells were  
353 purchased from the ATCC and maintained in airway epithelial medium, as recommended by  
354 ATCC. Primary cells were not used past passage 7.

### 355 Bacterial growth

356 Bacterial strains and plasmids used in this study are listed in Supplementary Table 1. *E. coli*  
357 was grown in Luria-Bertani (LB) broth and *S. aureus* was grown in tryptic soy broth (TSB) at  
358 37°C, shaken at 200 rpm, unless otherwise stated. Where appropriate, media were  
359 supplemented with erythromycin (3 µg/mL), chloramphenicol (12 µg/mL), lincomycin (10  
360 µg/mL), kanamycin (50 µg/mL), tetracycline (3µg/mL) or ampicillin (100 µg/mL). Solid media  
361 were supplemented with 1.5% (w/v) Bacto agar.

### 362 PCR and construct generation

363 *S. aureus* strain USA300 LAC, cured of the 27-kb plasmid that confers antibiotic resistance,  
364 was used as the WT strain for mutant generation, unless otherwise stated. Primers used in  
365 this study are listed in Supplementary Table 2. Transposon insertion mutants were obtained  
366 from the Nebraska transposon mutant library. For complementation, the full-length genes  
367 were amplified, ligated into pALC2073 and transformed into *E. coli*. All plasmids were  
368 passaged through RN4220, prior to transfer to the strain of interest.

### 369 Western blot

370 For detection of secreted bacterial proteins, bacteria were grown overnight in TSB, bacteria  
371 were pelleted and the supernatant (equal to OD<sub>600</sub> of 8) was used for a trichloroacetic acid  
372 (TCA) precipitation. Briefly, equal volumes of bacterial supernatant and 20% (w/v) TCA were  
373 mixed and incubated at 4°C for 3h. Samples were pelleted at 21 000 x g for 15 min, washed  
374 twice with ice-cold 70% ethanol and allowed to dry overnight. Pellets were re-suspended in  
375 40 µL Laemmli buffer, boiled at 95°C for 10 min and 15 µL loaded on a 12% SDS-PAGE gel.  
376 Samples were run at 150V for 90 min, and transferred on a nitrocellulose membrane using a  
377 TransBlotter Turbo (Biorad) standard settings. Membranes were blocked in 5% (w/v)  
378 skimmed milk in PBS + 0.1% Tween-20 (PBST) overnight at 4°C. Primary antibody was  
379 added at 1 in 500 dilution in blocking buffer for 2h at RT, followed by 3 washes with PBST.  
380 Secondary antibody (donkey anti-rabbit IRDye 800) was added at 1 in 20 000 dilution in  
381 PBST for 1h, followed by 3 washes with PBST. Membranes were imaged on a LiCor  
382 scanner.

### 383 Immunofluorescence

384 Bacteria were grown overnight in TSB, pelleted (equal to OD<sub>600</sub> of 4) and fixed in 4%  
385 paraformaldehyde (PFA) for 20 min. Cells were then washed twice with PBS and incubated  
386 with tetramethylrhodamine (TMR) labelled wheatgermagglutinin (WGA) (2 µg/mL) in PBS for  
387 1h. Cells were washed twice with PBS and blocked in 5% (w/v) bovine serum albumin for 2h  
388 at RT. Primary antibody was added at 1 in 500 dilution in blocking buffer for 2h at RT,  
389 followed by 3 washes with PBS. Secondary antibody (goat anti Rabbit AlexaFluor 488) was  
390 added at 1 µg/mL in PBS for 1h, followed by 3 washed with PBS. Cells were then re-  
391 suspended in 50 µL PBS and allowed to dry on coverslips. Coverslips were then mounted  
392 using Prolong Diamond and imaged on a Zeiss LSM880 confocal microscope.

### 393 Recombinant protein purification

394 Full length *isdA* was generated by amplification of the gene (without the N terminal signal  
395 sequence and the C terminal region following the LPXTG anchoring motif) and ligation into

396 pET28A+. The plasmid was then transformed into *E. coli* BL21 (DE3) and recombinant  
397 protein production was induced. Briefly, 0.5 L cultures were grown in LB with 100 µg/mL  
398 kanamycin until OD<sub>600</sub> of 0.6-0.8. Cultures were then induced with 1mM IPTG for 16h at RT,  
399 pelleted and frozen at -20°C. When required, pellets were defrosted, re-suspended in 50 mL  
400 lysis buffer (50 mM NaH<sub>2</sub>PO<sub>4</sub>, 300 mM NaCl, 10 mM imidazole, pH 8.0) with complete  
401 protease inhibitor (Roche, UK), passed through a One-Shot cell disruptor (Constant  
402 systems, Northants, UK) at 30 kPsi, centrifuged at 4000x g for 30 min and passed through a  
403 0.45µm filter. Proteins were purified by immobilised metal affinity chromatography (IMAC)  
404 with a FF Crude Ni-NTA column, using a gradient of 0 – 100 % elution buffer (50 mM  
405 NaH<sub>2</sub>PO<sub>4</sub>, 300 mM NaCl, 300 mM imidazole, pH 8) and dialysed in 50mM HEPES, pH 7.2.  
406 Relative protein concentration was determined using a Bradford assay.

#### 407 Virus growth and quantification

408 SARS CoV-2 isolates were acquired from BEI. SARS-Related Coronavirus 2 -- Isolate USA-  
409 WA1/2020 (Wuhan isolate) was deposited by the Centers for Disease Control and  
410 Prevention and obtained through BEI Resources, NIAID, NIH: SARS-Related Coronavirus 2,  
411 Isolate USA-WA1/2020, NR-52281. The Delta VOC strain used was SARS-CoV-2, B.1.617.2  
412 variant NR-55611. All experiments with live virus were performed under Biosafety Level 3  
413 conditions in Western University's ImPaKt facility. For generation of virus stocks, confluent  
414 Vero E6 cells were washed with PBS, infected with passage 1 virus in 5mL of serum-free  
415 DMEM (SFM) for 1h at 37°C, 5% CO<sub>2</sub>, with gentle rocking every 10 min. The inoculum was  
416 then removed, cells washed with PBS, and overlaid with DMEM + 2% FBS and incubated  
417 for 72h at 37°C, 5% CO<sub>2</sub>. The culture supernatant was collected, centrifuged at 500 x g for 10  
418 min and aliquots were stored at -80°C. For virus quantification, standard plaque assays were  
419 performed on Vero E6 cells. Briefly, confluent monolayers of cells in 6 well tissue culture  
420 plates were washed with PBS and infected with 400 µL of virus dilutions in SFM. Plates were  
421 incubated for 1h at 37°C, 5% CO<sub>2</sub>, with gentle rocking every 10 min. The inoculum was  
422 removed, and cells were overlaid with 2ml/well of a 1:1 mixture of 2.4% Avicel and 2 x  
423 Plaque overlay (91% 2xMEM, 4% FBS, 1% Pen/strep, 1% 1M HEPES, 0.5% GlutaMAX).  
424 Plates were incubated for 72h at 37°C, 5% CO<sub>2</sub>, after which cells were fixed by the addition  
425 of 2mL of 10% Neutral Buffered Formalin for 30 min at RT. The fixative was washed, and  
426 cells stained with Crystal violet (80% water, 20% Methanol, 1% (w/v) crystal violet) for 15  
427 min at RT. The stain was washed away with water, plates allowed to dry, and plaques  
428 counted.

#### 429 Adhesion, Invasion and bacterial replication in epithelial cells

430 For all experiments involving bacterial adhesion and invasion, confluent Vero E6 cells in 12  
431 well tissue culture plates were used. Cells were maintained in DMEM + 10% (v/v) FBS until  
432 the day of infection. On the day of infection, cells were washed twice with PBS and infected  
433 with CoV-2 at MOI of 1 in 100  $\mu$ L per well for 1h at 37°C, 5% CO<sub>2</sub>, with gentle rocking every  
434 10 min. The inoculum was then removed, cells washed with PBS and overlaid with 1mL of  
435 SFM. At indicated times post virus infection, bacteria were added at an MOI of 10.

436 Bacterial strains of interest were grown O/N in TSB, with appropriate antibiotics. Bacteria  
437 were then sub-cultured at OD<sub>600</sub> of 0.1 and grown in TSB, with appropriate antibiotics, to  
438 OD<sub>600</sub> of 0.6. Cells were then pelleted, washed twice with DMEM and re-suspended in  
439 DMEM to a density of 2x10<sup>7</sup> CFU/mL. 50  $\mu$ L of that suspension were added to a well of Vero  
440 E6 cells that were either uninfected or infected with CoV-2 containing 700  $\mu$ L of SFM. Plates  
441 were pelleted at 1000 rpm for 1 min and incubated at 37°C, 5% CO<sub>2</sub> for 30 min. For  
442 quantification of adhesion, media was then removed, cells lysed with 500  $\mu$ L of PBS + 0.1%  
443 (v/v) Triton - X100 and plated for CFU. The remaining wells were then treated with 150  
444  $\mu$ g/mL gentamicin for 30 min at 37°C, 5% CO<sub>2</sub>, extensively washed to remove the  
445 gentamicin, and kept in SFM for the desired duration of the infection, as indicated in the text.  
446 At specific times post infection, media was removed, and cells lysed in PBS + 0.1% (v/v)  
447 Triton - X100, scraped from the well, and plated for CFU.

#### 448 Virus infection with extracellular bacteria or recombinant protein

449 For infections where bacteria were added extracellularly, virus infection was performed as  
450 above (see Adhesion section) at an MOI of 1. Bacterial strains of interest were grown O/N in  
451 TSB, with appropriate antibiotics. Cells were then pelleted, washed twice with DMEM and re-  
452 suspended in DMEM to a density of 2x10<sup>7</sup> CFU/mL. 5  $\mu$ L of that suspension was added to  
453 the 1mL of SF DMEM present in virus infected wells. At 24h, the media was harvested,  
454 pelleted at 13 000 x g for 1 min the resulting supernatant was passed through a 13mm  
455 diameter 0.22 $\mu$ m filter. Cells were lysed with 500  $\mu$ L of PBS + 0.1% (v/v) Triton - X100, and  
456 the lysate was added to the pellet of extracellular bacteria, before plating for total CFU. For  
457 infections with heat killed bacteria, cells were treated as above, the 2x10<sup>7</sup> CFU/mL solution  
458 was incubated at 85°C for 30 min, and 5 $\mu$ L of that suspension was added to virus infected  
459 cells. For infections with bacterial supernatant, WT *S. aureus* were grown O/N in TSB, OD<sub>600</sub>  
460 was normalised to 4 and 50 $\mu$ L were added to virus infected cells. For protease treatment,  
461 supernatant was processed as above, 25  $\mu$ g of TPCK Trypsin were added for 1h min at  
462 37°C, followed by heat inactivation at 95°C for 20 min. 50 $\mu$ L were added to virus infected  
463 cells. For infections with recombinant protein, virus infection was done as above, and  
464 indicated concentrations of recombinant protein were added to the 1mL of SF DMEM

465 present in virus infected wells. For infections in the presence of inhibitors, 1µM of SD1008, 5  
466 µM CP 690550 citrate or Pyridone 6 or DMSO were added to cells immediately post  
467 inoculum removal, followed by the addition of *S. aureus* as above.

#### 468 RNA extraction and RNA sequencing

469 For RNAseq experiments, 12 well plates of Vero E6 cells were infected, or mock infected,  
470 with CoV-2 at an MOI of 1 and then treated with  $1 \times 10^5$  CFU *S. aureus* or respective mutants,  
471 as indicated in the respective figures. Cells were then washed 3 times with PBS and lifted  
472 with 500µL/well of Cell Protect Reagent (Qiagen) for 5 min. Samples from multiple wells  
473 were pooled (11 for RNAseq, 4-6 for RNA isolation and RT-PCR), pelleted at 1200 x *g* for 5  
474 min and stored at -80°C overnight. The cell pellet was lysed with 500 µL of PBS + 0.1% (v/v)  
475 Triton - X100 and RNA extracted using the QIAGEN RNAEasy kit, as per the manufacture's  
476 instructions. DNase treatment was performed with TURBO DNA Free kit (Invitrogen) for 2 x  
477 30 min, followed by inactivation with the supplied buffer. RNA sequencing was performed by  
478 the Microbial Genome Sequencing Center in Pittsburgh, PA. Data analysis, including read  
479 mapping and differential expression were performed by the Microbial Genome Sequencing  
480 Center in Pittsburgh, PA. Briefly quality control and adapter trimming was performed with  
481 bcl2fastq. Read mapping was performed with RSEM(41). Read counts loaded into R(42) and  
482 were normalized using edgeR's (43) Trimmed Mean of M values (TMM) algorithm.  
483 Subsequent values were then converted to counts per million (cpm). Differential expression  
484 analysis was performed using edgeR's Quasi-Linear F-Test (qlfTest) functionality against  
485 treatment groups.

#### 486 qPCR

487 1 µg of RNA was used in a reverse transcriptase reaction, as per the manufacturer's  
488 instructions (Agilent Technologies). qRT-PCR reactions were set up in 15µL volumes, using  
489 0.75µL of cDNA, using SYBRgreen master mix (BioRad) and run on a Roche Rotor-Gene  
490 6000 machine. Expression was normalized to GAPDH. Primers used are shown in Table 3.

#### 491 **Acknowledgements**

492 Work in the DEH and JD laboratories was supported by Canadian Institutes for Health  
493 Research Operating grants. This work was partially supported by a Western University  
494 Catalyst grant (49635) to DEH, MG and JD, and a British society for antimicrobial  
495 chemotherapy grant to DEH and MG (BSAC-COVID-99). Much of the work in this study was  
496 performed in a CL3 laboratory, which was funded by grants from the Canada Foundation for  
497 Innovation, The Ontario Research Fund, and the Schulich School of Medicine and Dentistry,  
498 University of Western Ontario.

## 499 References

- 500 1. Zhu N, Zhang D, Wang W, Li X, Yang B, Song J, Zhao X, Huang B, Shi W, Lu R, Niu P,  
501 Zhan F, Ma X, Wang D, Xu W, Wu G, Gao GF, Tan W. 2020. A Novel Coronavirus from  
502 Patients with Pneumonia in China, 2019. *N Engl J Med* 382:727–733.
- 503 2. Chan JF-W, Yuan S, Kok K-H, To KK-W, Chu H, Yang J, Xing F, Liu J, Yip CC-Y, Poon  
504 RW-S, Tsoi H-W, Lo SK-F, Chan K-H, Poon VK-M, Chan W-M, Ip JD, Cai J-P, Cheng  
505 VC-C, Chen H, Hui CK-M, Yuen K-Y. 2020. A familial cluster of pneumonia associated  
506 with the 2019 novel coronavirus indicating person-to-person transmission: a study of a  
507 family cluster. *The Lancet* 395:514–523.
- 508 3. Hu B, Guo H, Zhou P, Shi Z-L. 2021. Characteristics of SARS-CoV-2 and COVID-19.  
509 *Nat Rev Microbiol* 19:141–154.
- 510 4. Blanco-Melo D, Nilsson-Payant BE, Liu W-C, Møller R, Panis M, Sachs D, Albrecht RA,  
511 tenOever BR. 2020. SARS-CoV-2 launches a unique transcriptional signature from in  
512 vitro, ex vivo, and in vivo systems. *bioRxiv* 2020.03.24.004655.
- 513 5. Polack FP, Thomas SJ, Kitchin N, Absalon J, Gurtman A, Lockhart S, Perez JL, Pérez  
514 Marc G, Moreira ED, Zerbini C, Bailey R, Swanson KA, Roychoudhury S, Koury K, Li P,  
515 Kalina W V, Cooper D, Frenck RW, Hammitt LL, Türeci Ö, Nell H, Schaefer A, Ünal S,  
516 Tresnan DB, Mather S, Dormitzer PR, Şahin U, Jansen KU, Gruber WC. 2020. Safety  
517 and Efficacy of the BNT162b2 mRNA Covid-19 Vaccine. *N Engl J Med* 383:2603–2615.
- 518 6. Zhou F, Yu T, Du R, Fan G, Liu Y, Liu Z, Xiang J, Wang Y, Song B, Gu X, Guan L, Wei  
519 Y, Li H, Wu X, Xu J, Tu S, Zhang Y, Chen H, Cao B. 2020. Clinical course and risk  
520 factors for mortality of adult inpatients with COVID-19 in Wuhan, China: a retrospective  
521 cohort study. *The Lancet* 395:1054–1062.
- 522 7. Garcia-Vidal C, Sanjuan G, Moreno-García E, Puerta-Alcalde P, Garcia-Pouton N,  
523 Chumbita M, Fernandez-Pittol M, Pitart C, Inciarte A, Bodro M, Morata L, Ambrosioni J,  
524 Grafía I, Meira F, Macaya I, Cardozo C, Casals C, Tellez A, Castro P, Marco F, García  
525 F, Mensa J, Martínez JA, Soriano A, Rico V, Hernández-Meneses M, Agüero D, Torres  
526 B, González A, de la Mora L, Rojas J, Linares L, Fidalgo B, Rodriguez N, Nicolas D,  
527 Albiach L, Muñoz J, Almuedo A, Camprubí D, Angeles Marcos M, Camprubí D, Cilloniz  
528 C, Fernández S, Nicolas JM, Torres A. 2021. Incidence of co-infections and  
529 superinfections in hospitalized patients with COVID-19: a retrospective cohort study.  
530 *Clin Microbiol Infect* 27:83–88.
- 531 8. Ripa M, Galli L, Poli A, Oltolini C, Spagnuolo V, Mastrangelo A, Muccini C, Monti G, De  
532 Luca G, Landoni G, Dagna L, Clementi M, Rovere Querini P, Ciceri F, Tresoldi M,  
533 Lazzarin A, Zangrillo A, Scarpellini P, Castagna A, Andolina A, Redaelli MB, Bigai G,  
534 Bigoloni A, Borio G, Bossolasco S, Bruzzesi E, Calabrò MG, Calvisi S, Campochiaro C,  
535 Canetti D, Canti V, Castellani J, Castiglioni B, Cavalli G, Cavallo L, Cernuschi M,  
536 Chiurlo M, Cilla M, Cinel E, Cinque P, Conte C, Da Prat V, Danise A, De Lorenzo R,  
537 Dell’Acqua A, Dell’Acqua R, Della Torre E, Della Torre L, Di Terlizzi G, Dumea I, Farolfi  
538 F, Ferrante M, Frangi C, Fumagalli L, Gallina G, Germinario B, Gianotti N, Guffanti M,  
539 Hasson H, Lalla F, Lanzillotta M, Li Voti R, Messina E, Molinari C, Moizo E, Montagna  
540 M, Morsica G, Nozza S, Pascali M, Patrizi A, Pieri M, Poloniato A, Prestifilippo D,  
541 Ramirez G, Ranzenigo M, Sapienza J, Seghi F, Tambussi G, Tassan Din C, Turi S,  
542 Uberti-Foppa C, Vinci C. 2021. Secondary infections in patients hospitalized with  
543 COVID-19: incidence and predictive factors. *Clin Microbiol Infect* 27:451–457.
- 544 9. Westblade LF, Simon MS, Satlin MJ. 2021. Bacterial coinfections in coronavirus  
545 disease 2019. *Trends Microbiol* <https://doi.org/10.1016/j.tim.2021.03.018>.
- 546 10. Adalbert JR, Varshney K, Tobin R, Pajaro R. 2021. Clinical outcomes in patients co-  
547 infected with COVID-19 and *Staphylococcus aureus*: a scoping review. *BMC Infect Dis*  
548 21:985.
- 549 11. Langford BJ, So M, Leung V, Raybardhan S, Lo J, Kan T, Leung F, Westwood D,  
550 Daneman N, MacFadden DR, Soucy J-PR. 2022. Predictors and microbiology of  
551 respiratory and bloodstream bacterial infection in patients with COVID-19: living rapid  
552 review update and meta-regression. *Clin Microbiol Infect* 28:491–501.



- 553 12. Taubenberger JK, Morens DM. 2006. 1918 Influenza: the mother of all pandemics.  
554 Emerg Infect Dis 12:15–22.
- 555 13. McCullers JA. 2014. The co-pathogenesis of influenza viruses with bacteria in the lung.  
556 Nat Rev Microbiol 12:252.
- 557 14. Iverson AR, Boyd KL, McAuley JL, Plano LR, Hart ME, McCullers JA. 2011. Influenza  
558 virus primes mice for pneumonia from *Staphylococcus aureus*. J Infect Dis 203:880–  
559 888.
- 560 15. Rynda-Apple A, Harmsen A, Erickson AS, Larson K, Morton R V, Richert LE, Harmsen  
561 AG. 2014. Regulation of IFN- $\gamma$  by IL-13 dictates susceptibility to secondary  
562 postinfluenza MRSA pneumonia. Eur J Immunol 44:3263–3272.
- 563 16. Borgogna TR, Hisey B, Heitmann E, Obar JJ, Meissner N, Voyich JM. 2018. Secondary  
564 bacterial pneumonia by *Staphylococcus aureus* Following Influenza A Infection Is  
565 SaeR/S Dependent. J Infect Dis 218:809–813.
- 566 17. Bloes DA, Haasbach E, Hartmayer C, Hertlein T, Klingel K, Kretschmer D, Planz O,  
567 Peschel A. 2017. Phenol-Soluble Modulin Peptides Contribute to Influenza A Virus-  
568 Associated *Staphylococcus aureus* Pneumonia. Infect Immun 85:e00620-17.
- 569 18. Rowe HM, Meliopoulos VA, Iverson A, Bomme P, Schultz-Cherry S, Rosch JW. 2019.  
570 Direct interactions with influenza promote bacterial adherence during respiratory  
571 infections. Nat Microbiol <https://doi.org/10.1038/s41564-019-0447-0>.
- 572 19. Goncheva MI, Conceicao C, Tuffs SW, Lee H-M, Quigg-Nicol M, Bennet I, Sargison F,  
573 Pickering AC, Hussain S, Gill AC, Dutia BM, Digard P, Fitzgerald JR. 2020.  
574 *Staphylococcus aureus* Lipase 1 Enhances Influenza A Virus Replication. mBio  
575 11:e00975-20.
- 576 20. Sinha B, François PP, Nüsse O, Foti M, Hartford OM, Vaudaux P, Foster TJ, Lew DP,  
577 Herrmann M, Krause KH. 1999. Fibronectin-binding protein acts as *Staphylococcus*  
578 *aureus* invasion via fibronectin bridging to integrin alpha5beta1. Cell Microbiol 1:101–  
579 117.
- 580 21. Grundmeier M, Hussain M, Becker P, Heilmann C, Peters G, Sinha B. 2004. Truncation  
581 of fibronectin-binding proteins in *Staphylococcus aureus* strain Newman leads to  
582 deficient adherence and host cell invasion due to loss of the cell wall anchor function.  
583 Infect Immun 72:7155–7163.
- 584 22. Goncheva MI, Flannagan RS, Heinrichs DE. 2020. De Novo Purine Biosynthesis Is  
585 Required for Intracellular Growth of *Staphylococcus aureus* and for the Hypervirulence  
586 Phenotype of a purR mutant. Infect Immun 88:e00104-20.
- 587 23. Mazmanian SK, Ton-That H, Schneewind O. 2001. Sortase-catalysed anchoring of  
588 surface proteins to the cell wall of *Staphylococcus aureus*. Mol Microbiol 40:1049–  
589 1057.
- 590 24. Foster TJ. 2019. Surface Proteins of *Staphylococcus aureus*. Microbiol Spectr 7:7.4.2.
- 591 25. Alonzo F, Torres VJ. 2014. The bicomponent pore-forming leucocidins of  
592 *Staphylococcus aureus*. Microbiol Mol Biol Rev 78:199–230.
- 593 26. Duan Z, Bradner J, Greenberg E, Mazitschek R, Foster R, Mahoney J, Seiden MV.  
594 2007. 8-Benzyl-4-oxo-8-azabicyclo[3.2.1]oct-2-ene-6,7-dicarboxylic Acid (SD-1008), a  
595 Novel Janus Kinase 2 Inhibitor, Increases Chemotherapy Sensitivity in Human Ovarian  
596 Cancer Cells. Mol Pharmacol 72:1137–1145.
- 597 27. Shambat SM, Gómez-Mejía A, Schweizer TA, Huemer M, Chang C-C, Acevedo C,  
598 Bergada-Pijuan J, Vulin C, Hofmaenner DA, Scheier TC, Hertegonne S, Parietti E,  
599 Miroshnikova N, Garcia PDW, Hilty MP, Buehler PK, Schuepbach RA, Brugger SD,  
600 Zinkernagel AS. 2022. Hyperinflammatory environment drives dysfunctional myeloid  
601 cell effector response to bacterial challenge in COVID-19. PLOS Pathog 18:e1010176.
- 602 28. Warnking K, Klemm C, Löffler B, Niemann S, van Krüchten A, Peters G, Ludwig S,  
603 Ehrhardt C. 2015. Super-infection with *Staphylococcus aureus* inhibits influenza virus-  
604 induced type I IFN signalling through impaired STAT1-STAT2 dimerization. Cell  
605 Microbiol 17:303–317.

- 606 29. Vermeiren CL, Pluym M, Mack J, Heinrichs DE, Stillman MJ. 2006. Characterization of  
607 the Heme Binding Properties of *Staphylococcus aureus* IsdA. *Biochemistry* 45:12867–  
608 12875.
- 609 30. Sheldon JR, Laakso HA, Heinrichs DE. 2016. Iron Acquisition Strategies of Bacterial  
610 Pathogens. *Microbiol Spectr* 4:4.2.05.
- 611 31. Corrigan RM, Miajlovic H, Foster TJ. 2009. Surface proteins that promote adherence of  
612 *Staphylococcus aureus* to human desquamated nasal epithelial cells. *BMC Microbiol*  
613 9:22.
- 614 32. Clarke SR, Andre G, Walsh EJ, Dufrêne YF, Foster TJ, Foster SJ. 2009. Iron-  
615 Regulated Surface Determinant Protein A Mediates Adhesion of *Staphylococcus*  
616 *aureus* to Human Corneocyte Envelope Proteins. *Infect Immun* 77:2408–2416.
- 617 33. Clarke SR, Brummell KJ, Horsburgh MJ, McDowell PW, Mohamad SAS, Stapleton MR,  
618 Acevedo J, Read RC, Day NPJ, Peacock SJ, Mond JJ, Kokai-Kun JF, Foster SJ. 2006.  
619 Identification of In Vivo–Expressed Antigens of *Staphylococcus aureus* and Their Use  
620 in Vaccinations for Protection against Nasal Carriage. *J Infect Dis* 193:1098–1108.
- 621 34. Wang W, Xu L, Su J, Peppelenbosch MP, Pan Q. 2017. Transcriptional Regulation of  
622 Antiviral Interferon-Stimulated Genes. *Trends Microbiol* 25:573–584.
- 623 35. Da-Yuan C, Nazimuddin K, J. CB, K. GR, Benjamin B, H. TA, Devin K, L. CH, K. EJ, C.  
624 CV, A. CN, S. CC, N. KD, C. BS, Y. FS, H. CJ, Florian D, Andrew E, Mohsan S, T. HM.  
625 2022. SARS-CoV-2 Disrupts Proximal Elements in the JAK-STAT Pathway. *J Virol*  
626 95:e00862-21.
- 627 36. Rincon-Arevalo H, Aue A, Ritter J, Szelinski F, Khadzhynov D, Zickler D, Stefanski L,  
628 Lino AC, Körper S, Eckardt K-U, Schrezenmeier H, Dörner T, Schrezenmeier EV.  
629 2022. Altered increase in STAT1 expression and phosphorylation in severe COVID-19.  
630 *Eur J Immunol* 52:138–148.
- 631 37. Wathelet MG, Orr M, Frieman MB, Baric RS. 2007. Severe Acute Respiratory  
632 Syndrome Coronavirus Evades Antiviral Signaling: Role of nsp1 and Rational Design of  
633 an Attenuated Strain. *J Virol* 81:11620–11633.
- 634 38. Mizutani T, Fukushi S, Murakami M, Hirano T, Saijo M, Kurane I, Morikawa S. 2004.  
635 Tyrosine dephosphorylation of STAT3 in SARS coronavirus-infected Vero E6 cells.  
636 *FEBS Lett* 577:187–192.
- 637 39. Uetani K, Hiroi M, Meguro T, Ogawa H, Kamisako T, Ohmori Y, Erzurum SC. 2008.  
638 Influenza A virus abrogates IFN- $\gamma$  response in respiratory epithelial cells by disruption  
639 of the Jak/Stat pathway. *Eur J Immunol* 38:1559–1573.
- 640 40. Ma P, Gu K, Li H, Zhao Y, Li C, Wen R, Zhou C, Lei C, Yang X, Wang H. 2022.  
641 Infectious Bronchitis Virus Nsp14 Degrades JAK1 to Inhibit the JAK-STAT Signaling  
642 Pathway in HD11 Cells. *Viruses* 14:1045.
- 643 41. Li B, Dewey CN. 2011. RSEM: accurate transcript quantification from RNA-Seq data  
644 with or without a reference genome. *BMC Bioinformatics* 12:323.
- 645 42. Team RC. 2013. R: A language and environment for statistical computing.
- 646 43. Robinson MD, McCarthy DJ, Smyth GK. 2010. edgeR: a Bioconductor package for  
647 differential expression analysis of digital gene expression data. *Bioinformatics* 26:139–  
648 140.
- 649

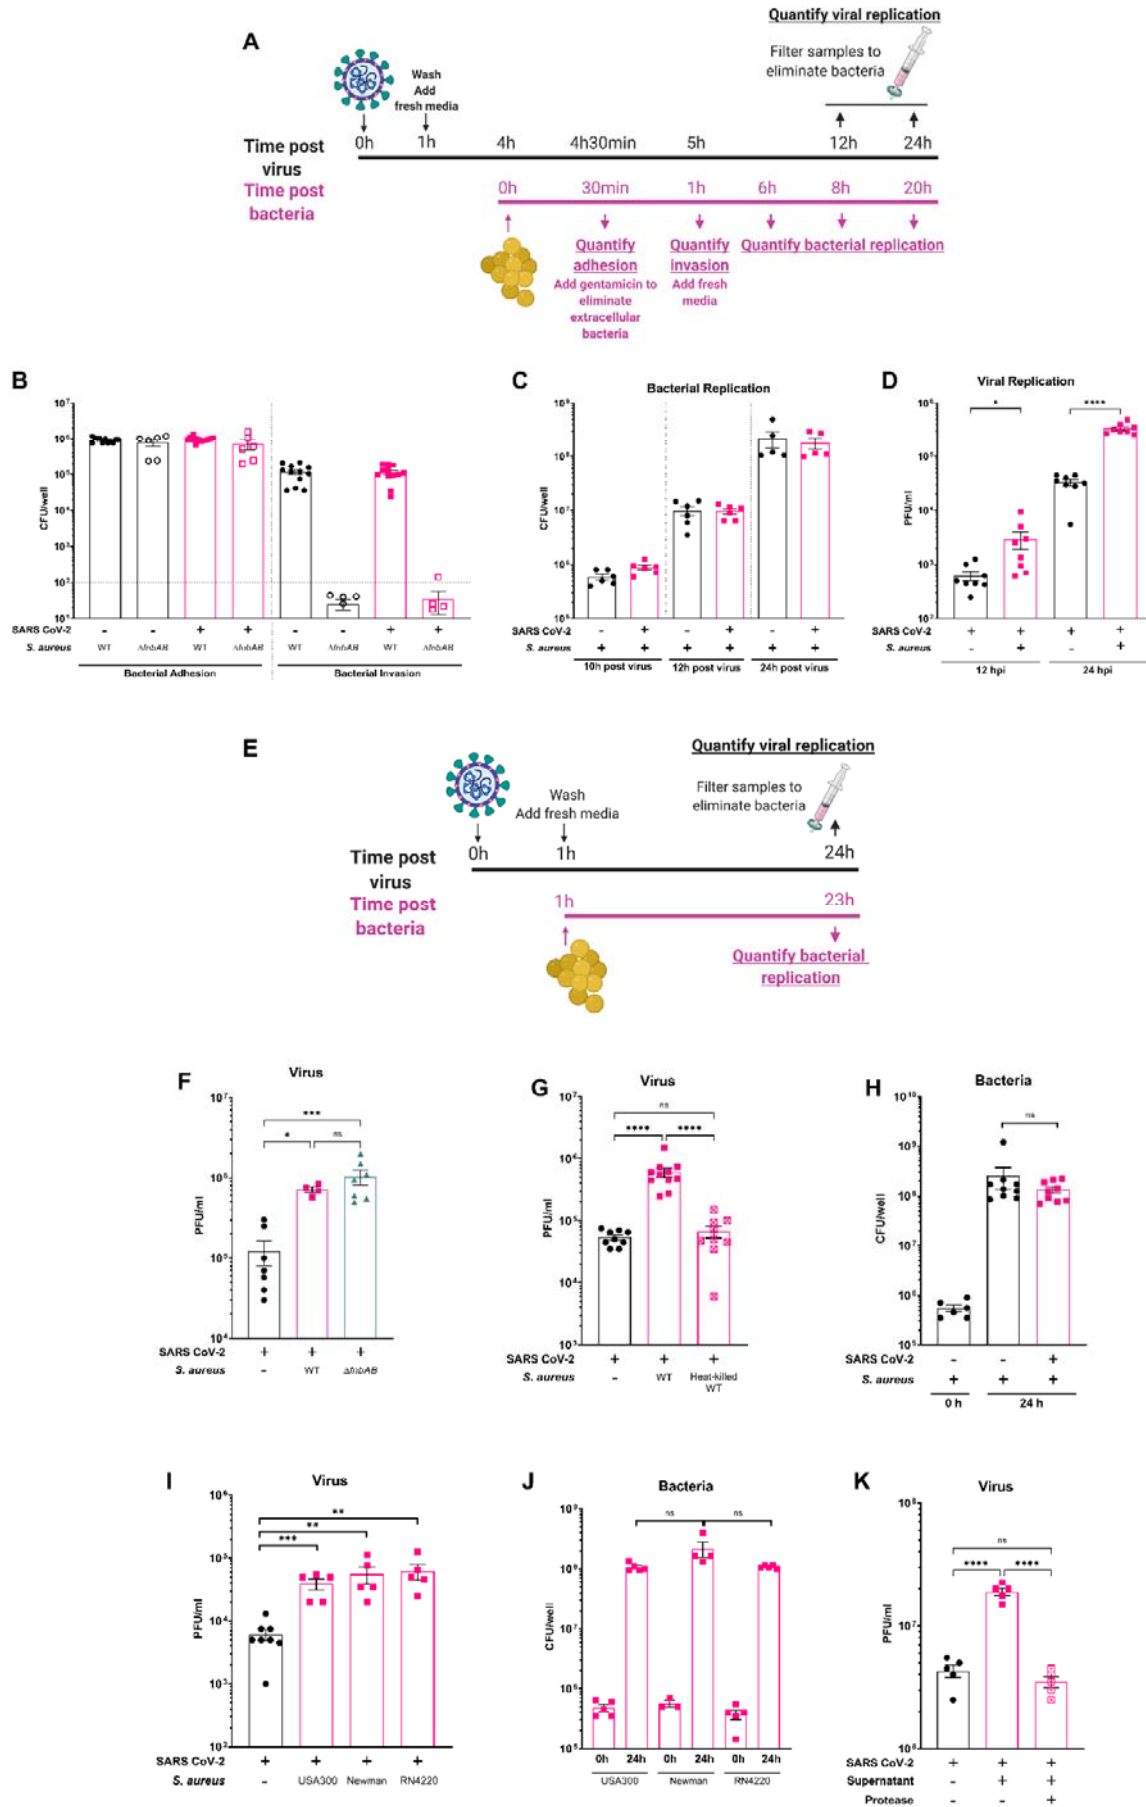

651 **Figure 1 - *S. aureus* enhances CoV-2 replication in Vero E6 cells.** **A** - schematic  
652 representation of experimental procedures in the *in vitro* co-infection model. **B** - Vero E6  
653 cells were mock infected or infected with CoV-2 at MOI of 1 for 1h, and at 4h, *S. aureus* was  
654 added to the cells at an MOI of 10. Bacterial adhesion was assessed after 30 min, by lysing  
655 Vero E6 cells and enumerating the total number of CFU. Representative wells were treated  
656 with 150 µg/mL of gentamicin for 30 min, cells were washed 2 times with PBS and then  
657 lysed for bacterial enumeration. Horizontal dotted line shows limit of accurate detection. **C** -  
658 Cells were treated as in B, except post washing, cells were overlaid with 1mL of SF  
659 DMEM. At indicated times, DMEM was removed, and cells lysed for enumeration of bacteria.  
660 **D** - Cells were treated as in C, except at indicated times, DMEM was harvested, samples  
661 were centrifuged for 1 min at 13000 x *g*, and the resulting supernatant was passed through a  
662 0.22 µm filter before being used to determine viral titre in a standard plaque assay on Vero  
663 E6 cells. **E** - schematic representation of the modified experimental model used for the  
664 remainder of the study. **F** - Vero E6 cells were infected with CoV-2 at MOI of 1 for 1h and  
665 overlaid with 1mL of SF DMEM. 1x10<sup>5</sup> CFU of WT or  $\Delta$ *fnbAB* *S. aureus* were added to the  
666 culture media. 24h later, DMEM was harvested, samples were centrifuged for 1 min at  
667 13000 x *g*, and the resulting supernatant was passed through a 0.22 µm filter before  
668 determination of viral titre. **G** - cells were infected as in F, except 1x10<sup>5</sup> CFU of either *S.*  
669 *aureus* or heat killed *S. aureus* were added. At 24h, samples were harvested and viral titre  
670 determined as in F. **H** - the pelleted samples from G were re-suspended in 500 µL PBS + 0.1  
671 % Triton X-100 and bacterial CFU was enumerated. **I** - Cells were infected as in F, and  
672 1x10<sup>5</sup> CFU of *S. aureus* strains USA300, Newman or RN4220 added. **J** - Pelleted samples  
673 from I were processed as in H. **K** - Cells were infected with CoV-2 at MOI of 1 and 50 µL of  
674 either TSB, bacterial supernatant, or protease treated bacterial supernatant were added to  
675 the SF DMEM. Infections were harvested 24h later and viral titre determined. For all  
676 experiments, viral titre was determined through plaque assay on Vero E6 cells. Data shown  
677 are mean ±SEM of 3-5 independent experiments. In some experiments (B, C, D, G, H), each  
678 replicate included 2 independent bacterial cultures. Statistical analysis - unpaired student's t  
679 test. \*p<0.05, \*\* p<0.01, \*\*\* p<0.01, \*\*\*\* p<0.001.

680

681

682

683

684

685

686

687

688

689

690

691

692

693

694

695

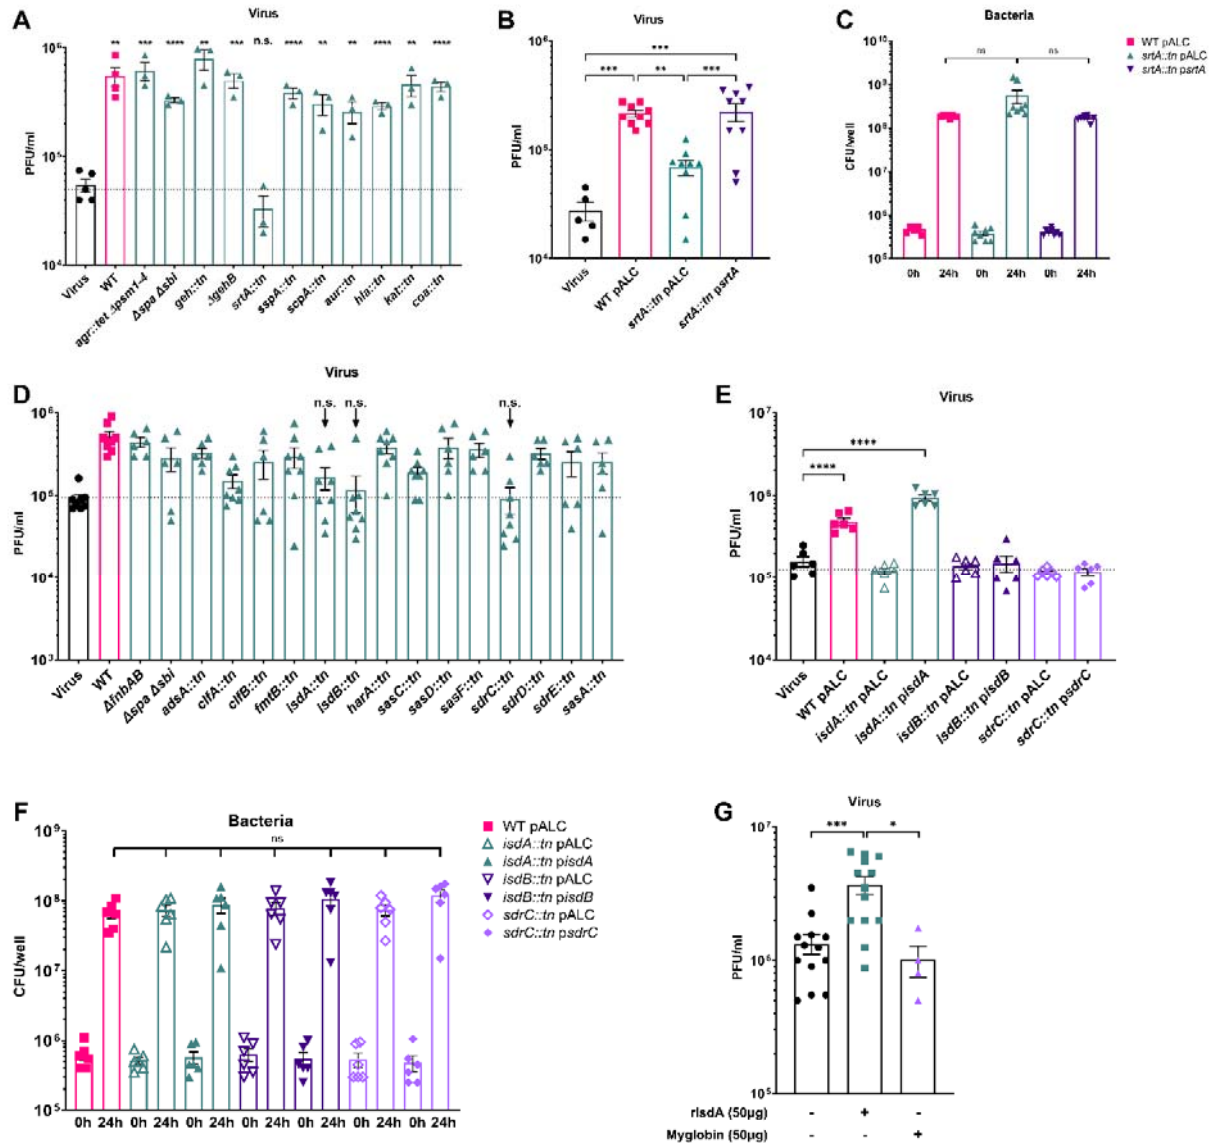

696

697 **Figure 2 – The *S. aureus* iron regulated surface determinant A (IsdA) mediates pro-**  
 698 **viral activity.** **A** - Vero E6 cells were infected with CoV-2 at MOI of 1 for 1h and overlaid  
 699 with 1ml of SF DMEM.  $1 \times 10^5$  CFU of WT or indicated mutants of *S. aureus* were added to  
 700 the culture media. Infections were harvested at 24h and viral titre was determined. Data  
 701 shown are mean SEM of 3 independent experiments. **B** – Cells were infected as in **A**, but  
 702 with strains carrying empty vector controls or complementing plasmids. Data shown are  
 703 mean SEM of 3 independent experiments, with 3 replicates per experiment. **C** - the pelleted  
 704 samples from B were re-suspended in 500  $\mu$ L PBS + 0.1 % Triton X-100 and bacterial CFU  
 705 was enumerated. **D** – cells were infected as in A, but different *S. aureus* mutants were  
 706 added. Data shown are mean SEM of 3 independent experiments, with 2 replicates per  
 707 experiment. **E** – cells were infected as in A, but with strains carrying empty vector controls  
 708 or complementing plasmids. Data shown are mean SEM of 3 independent experiments, with  
 709 2 replicates per experiment. **F** – samples from E were processed as in C. **G** – Vero E6 cells  
 710 were infected as in A, but 50 $\mu$ g of recombinant IsdA, myoglobin or equal of buffer (50mM  
 711 HEPES, pH 7.2) were added. Samples were harvested at 24h and viral titre determined. For  
 712 all experiments, viral titre was determined through plaque assay on Vero E6 cells. Statistical  
 713 analysis – B, E, - one-way ANOVA with multiple comparisons between all samples, and

714 Turkey's post-test. A, C, D, F and G - unpaired student's t test. \* $p < 0.05$ , \*\*  $p < 0.01$ , \*\*\*  
 715  $p < 0.01$ , \*\*\*\*  $p < 0.001$ .

716

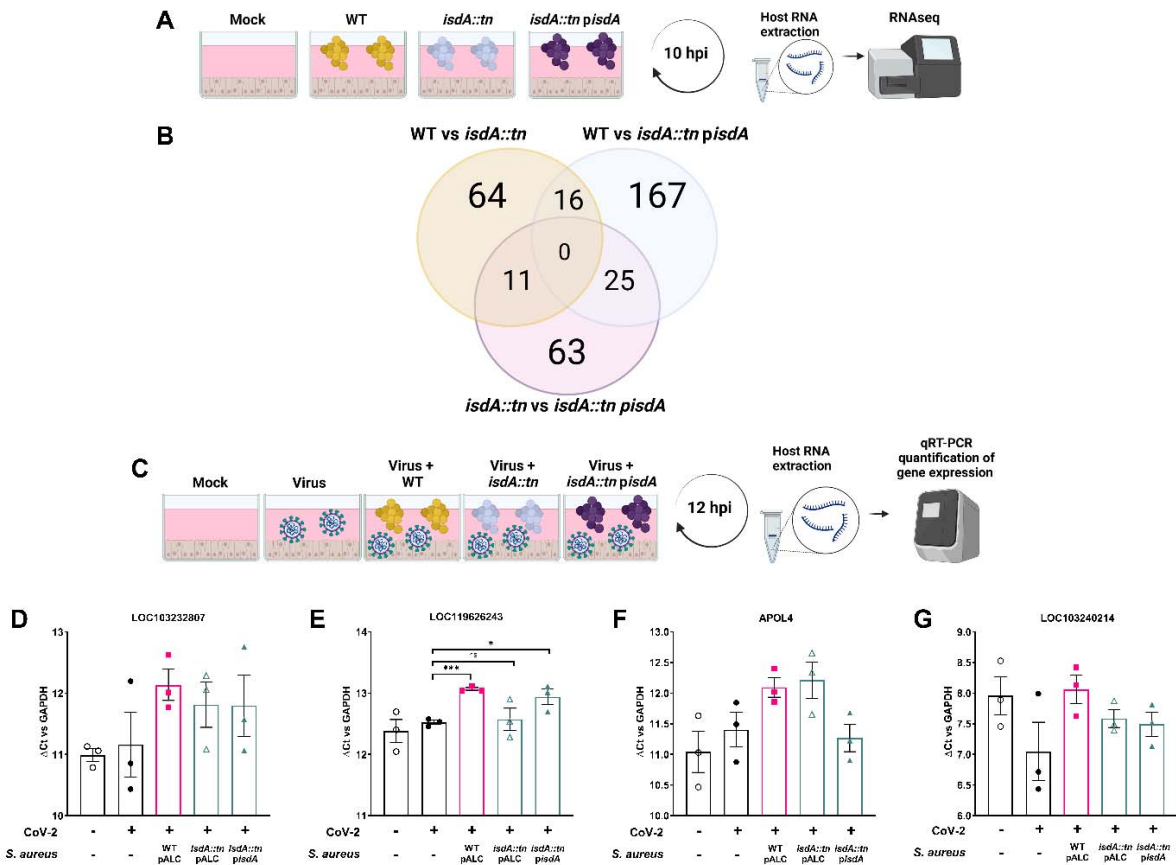

717

718 **Figure 3 – *S. aureus* expressing IsdA specifically modulates host cell transcript levels.**  
 719 **A** – Schematic representation of the experimental model used for RNAseq sample  
 720 generation. **B** – Numbers of differentially expressed genes between cells treated with  
 721 different bacterial mutants. **C** – Schematic representation of the experimental model used for  
 722 RT-PCR sample generation. **D - G** – Vero E6 cells were infected as shown in C, total RNA  
 723 extracted and RT-PCR was performed for the indicated genes. All Ct values were  
 724 normalised to GAPDH levels of the sample. Data shown are mean  $\pm$  SEM of 3 independent  
 725 experiments. Statistical analysis – unpaired student's t test. \* $p < 0.05$ , \*\*  $p < 0.01$ , \*\*\*  $p < 0.01$ .

726

727

728

729

730

731

732

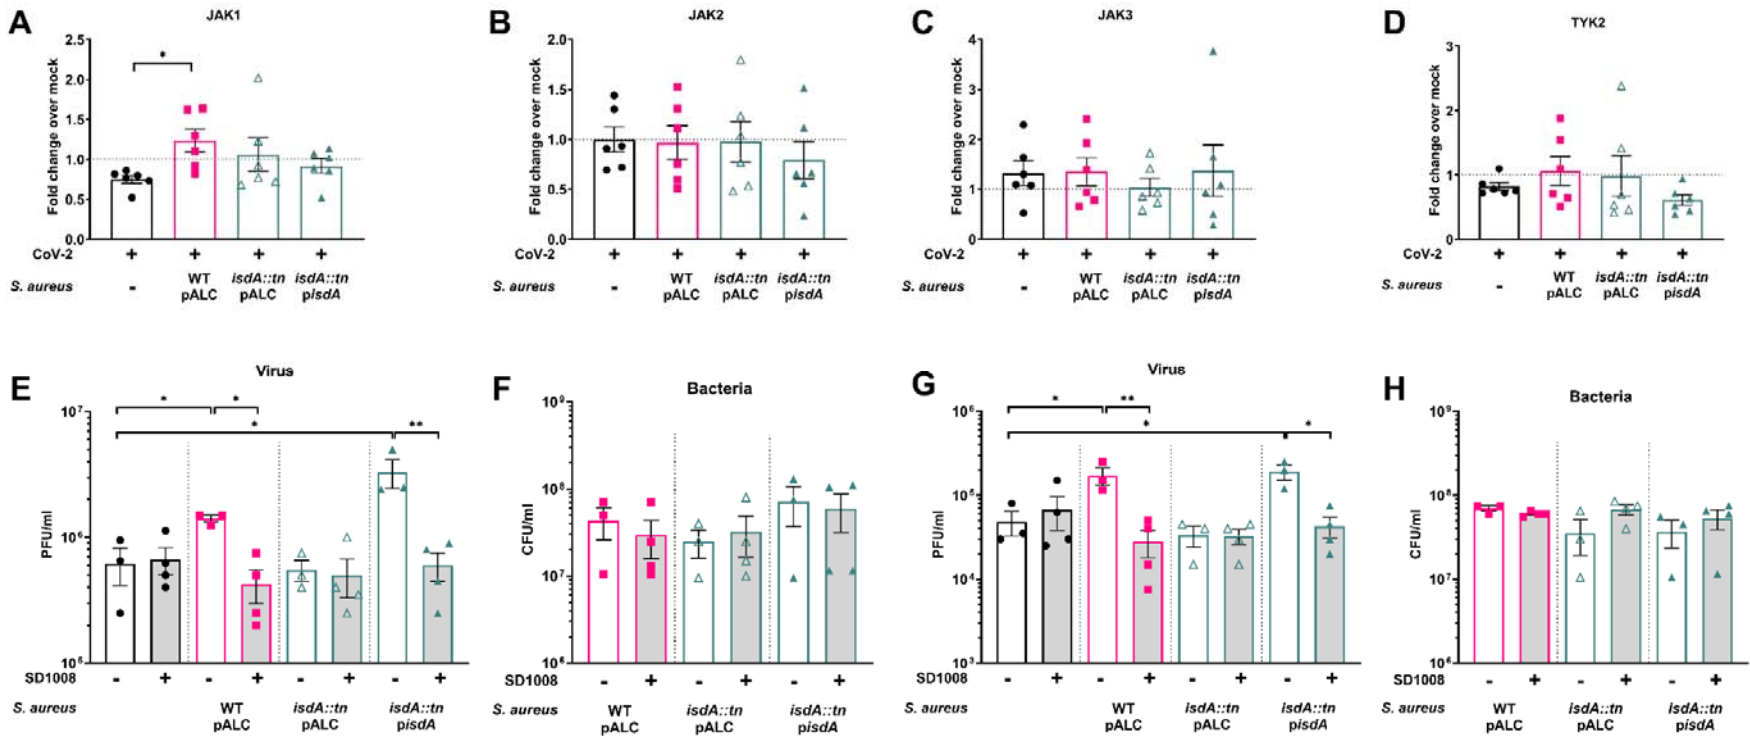

733

734 **Figure 4 – *S. aureus* IsdA affects JAK-STAT signalling to promote virus replication.** A-D Vero E6 cells were infected with CoV-2 at an  
 735 MOI of 1 for 1h and overlaid with 1mL of SF DMEM. 1x10<sup>5</sup> CFU of WT or indicated mutants of *S. aureus* were added to the culture media. At  
 736 12hpi, total RNA was extracted, and RT-PCR was performed for the indicated genes. All Ct values were normalised to GAPDH levels of the  
 737 sample. Data shown are mean ± SEM of 5 independent experiments. E-H Cells were infected as in A, and 1 μM of SD1008 or DMSO were  
 738 added concurrently with the bacteria. At 24hpi, viral titre was determined by plaque assay. The pelleted bacteria were re-suspended in 500 μL  
 739 PBS + 0.1 % Triton X-100 and bacterial CFU was enumerated. Data shown are mean ± SEM of 3-4 independent experiments. Statistical  
 740 analysis –unpaired student's t test. \*p<0.05, \*\* p<0.01.

741 Table 1 – Host genes that were differentially expressed when exposed to *S. aureus*  
 742 expressing *IsdA* (i.e. present in the comparison of both WT vs *isdA::tn* and *isdA::tn* vs  
 743 *isdA::tn pisdA*). A log2 fold change cut-off of >1 and < -1 was used.

| Locus        | Description                                            | Homologous Human Gene | WT vs <i>isdA::tn</i> |         | <i>isdA::tn</i> vs <i>isdA::tn pisdA</i> |         |
|--------------|--------------------------------------------------------|-----------------------|-----------------------|---------|------------------------------------------|---------|
|              |                                                        |                       | Log2 Fold change      | p value | Log2 Fold change                         | p value |
| LOC103232807 | rho GTPase-activating protein 4                        | ARHGAP4               | -5.85                 | 0.026   | -5.61                                    | 0.033   |
| LOC103235349 | zinc finger and SCAN domain-containing protein 5B-like | ZSCAN5B               | -2.97                 | 0.0004  | -1.96                                    | 0.014   |
| LOC119622462 | uncharacterized                                        |                       | -2.17                 | 0.001   | -2.02                                    | 0.001   |
| LOC119626243 | collagen alpha-1(I) chain-like                         | JAK1                  | -1.69                 | 0.0002  | -1.10                                    | 0.008   |
| LOC103229191 | uncharacterized                                        | GPHN                  | -1.58                 | 0.007   | -1.20                                    | 0.033   |
| APOL4        | apolipoprotein L4                                      | APOL4                 | -1.34                 | 0.015   | -1.48                                    | 0.007   |
| LOC103240214 | probable E3 ubiquitin-protein ligase HECTD2            | HECTD2                | -1.25                 | 0.026   | -2.21                                    | 0.0003  |
| LOC119624411 | uncharacterized                                        | AOPEP                 | -1.06                 | 0.048   | -1.18                                    | 0.027   |
| LOC119622958 | uncharacterized                                        | N/A                   | -1.06                 | 0.04    | -1.11                                    | 0.029   |
| LOC103241337 | PSME3-interacting protein-like                         | PSME3                 | -1.04                 | 0.048   | -1.07                                    | 0.043   |
| PIWIL1       | piwi like RNA-mediated gene silencing 1                | PIWIL1                | 1.78                  | 0.008   | 1.64                                     | 0.011   |

744



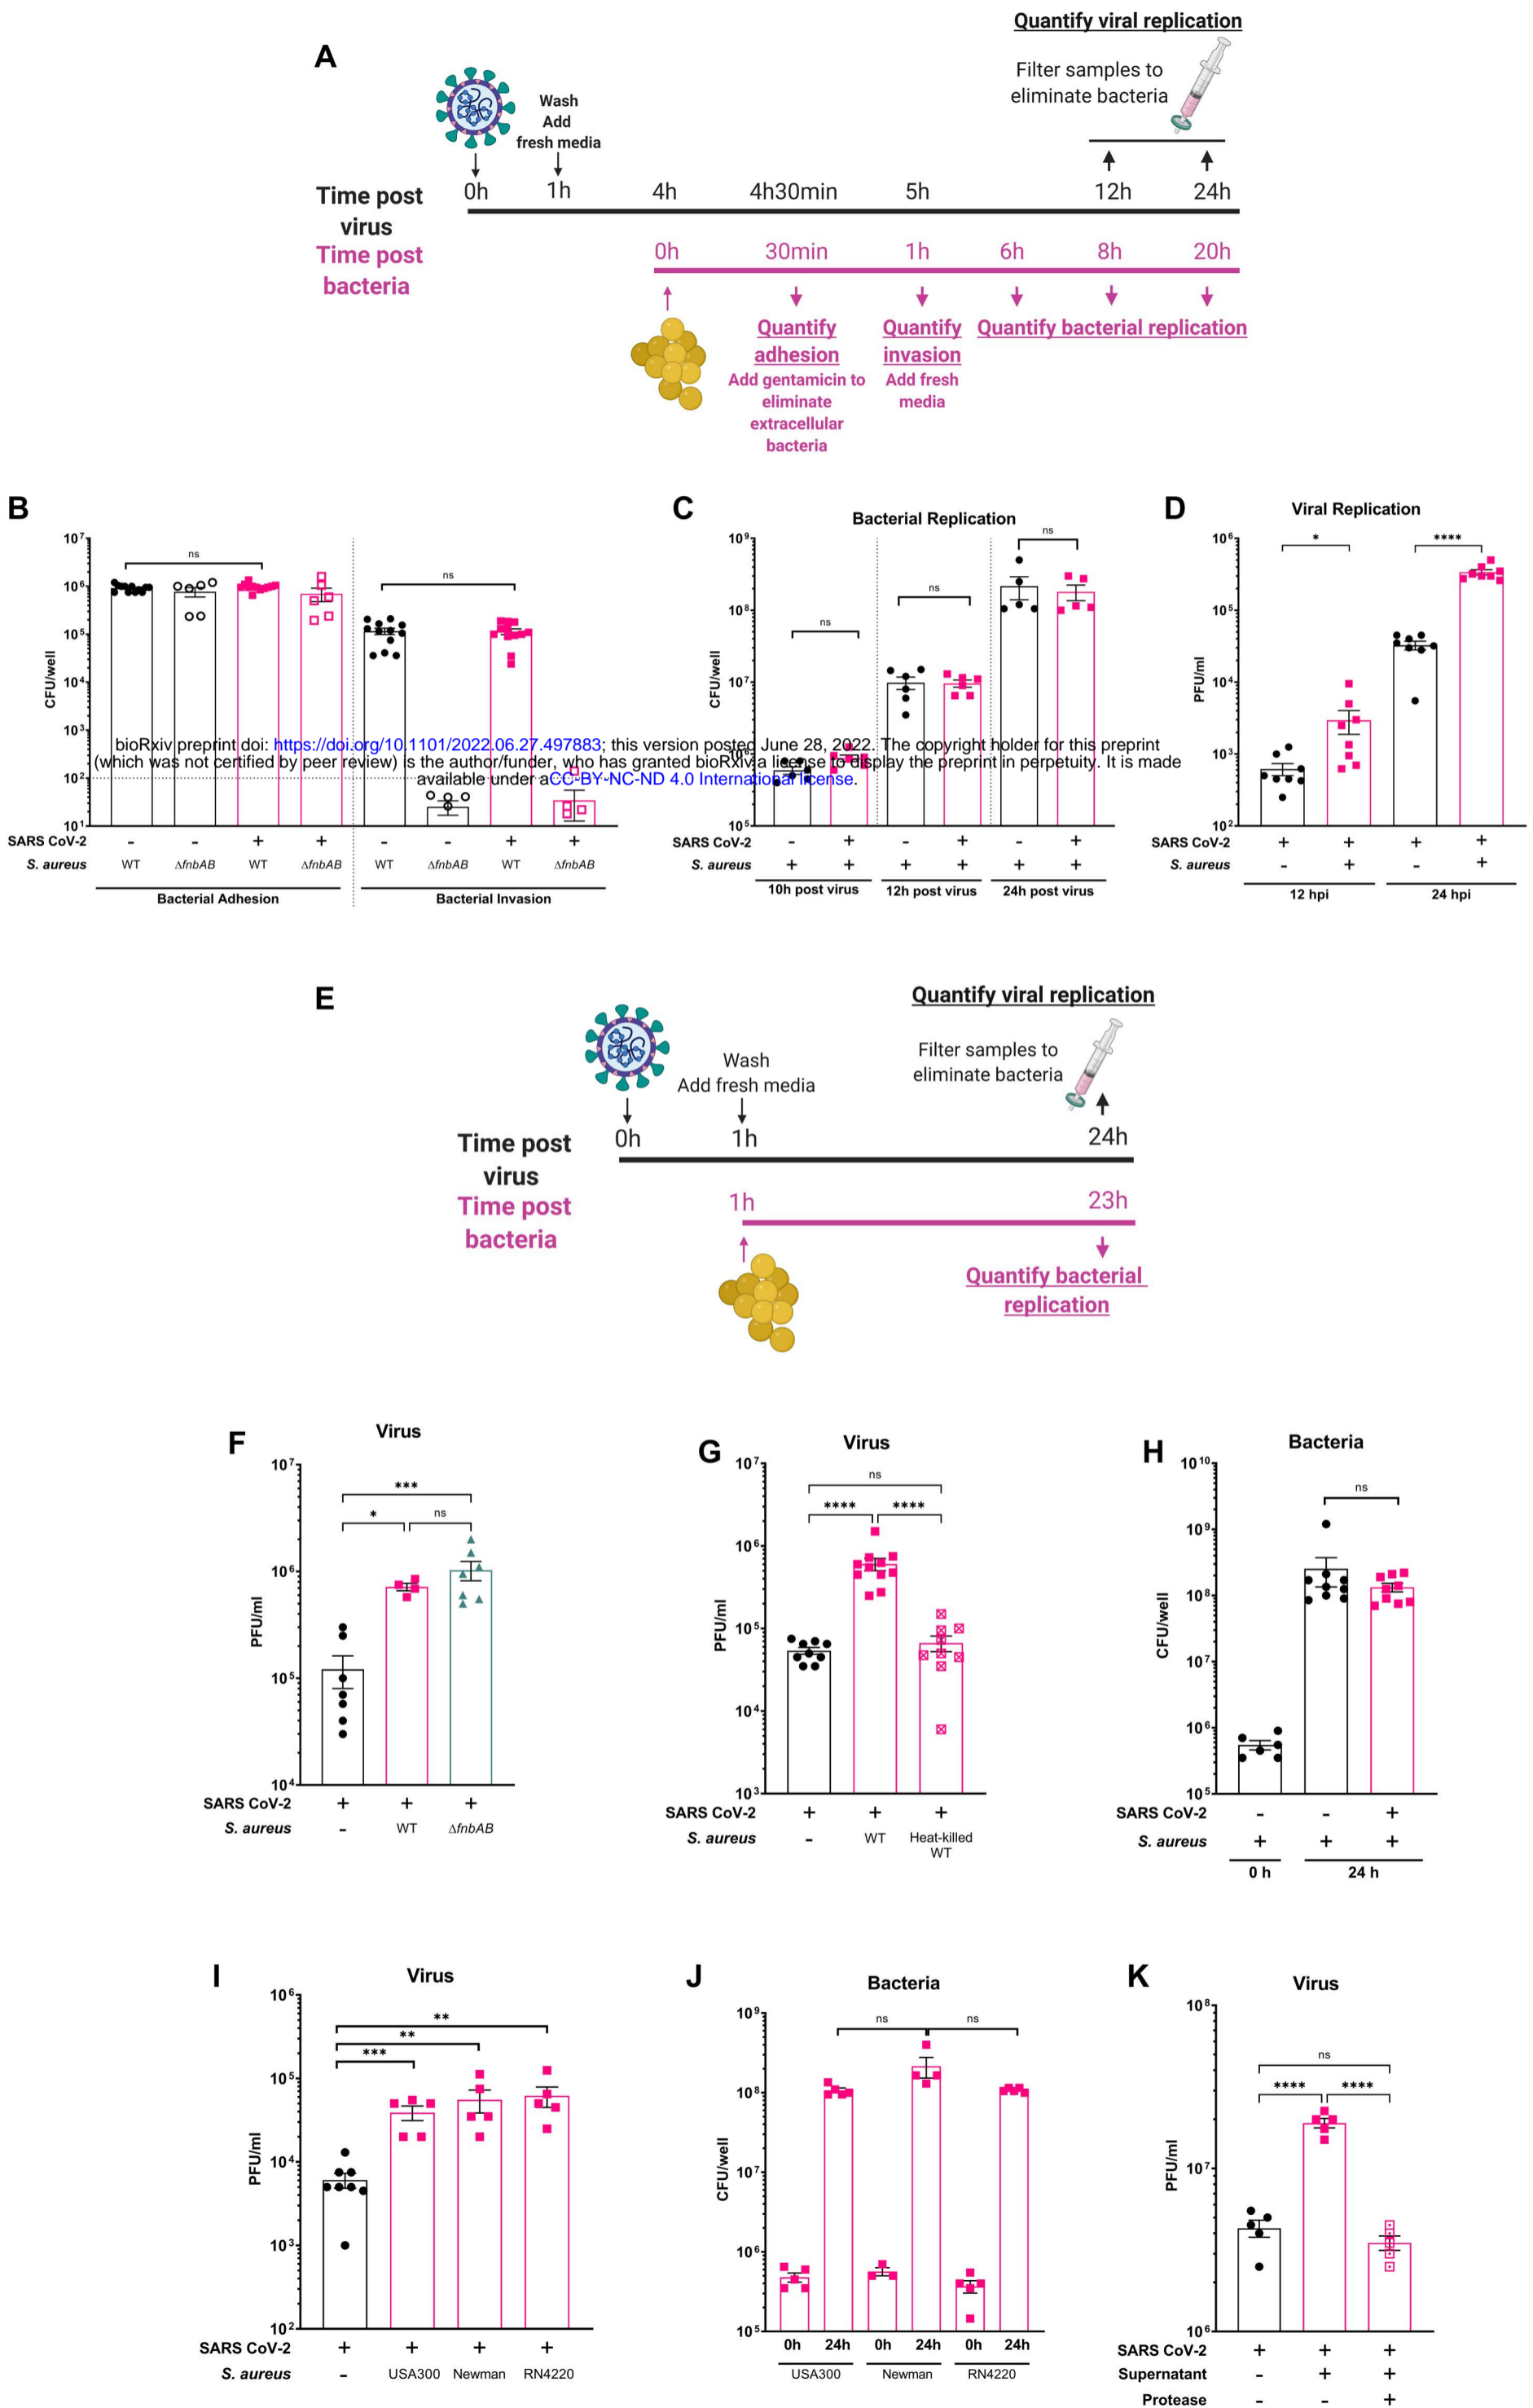

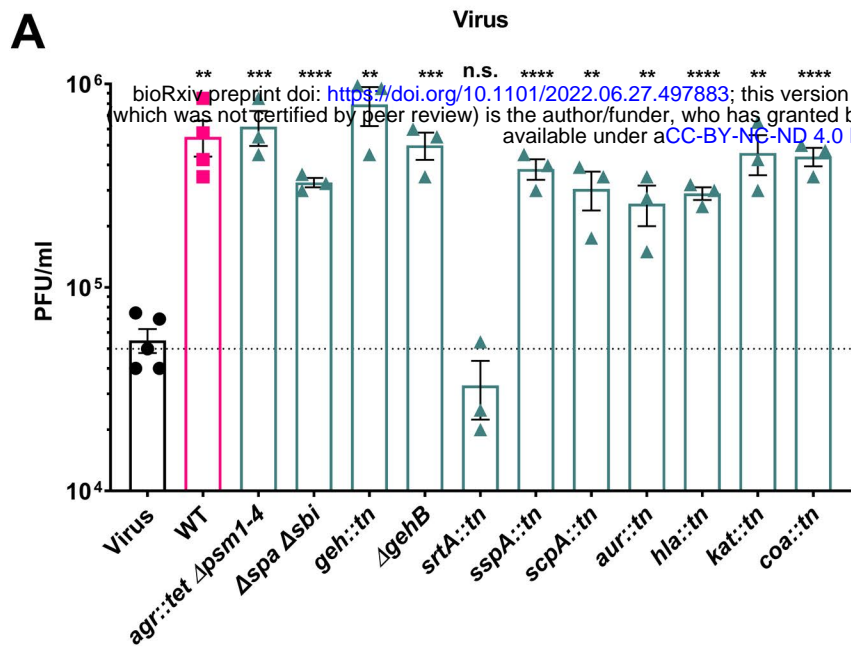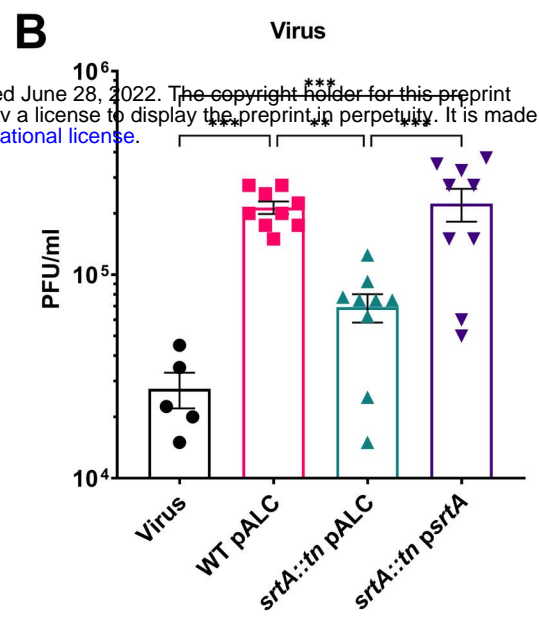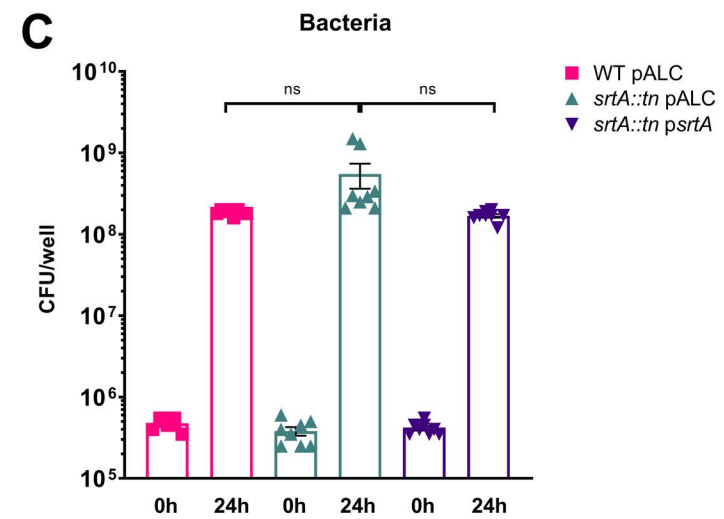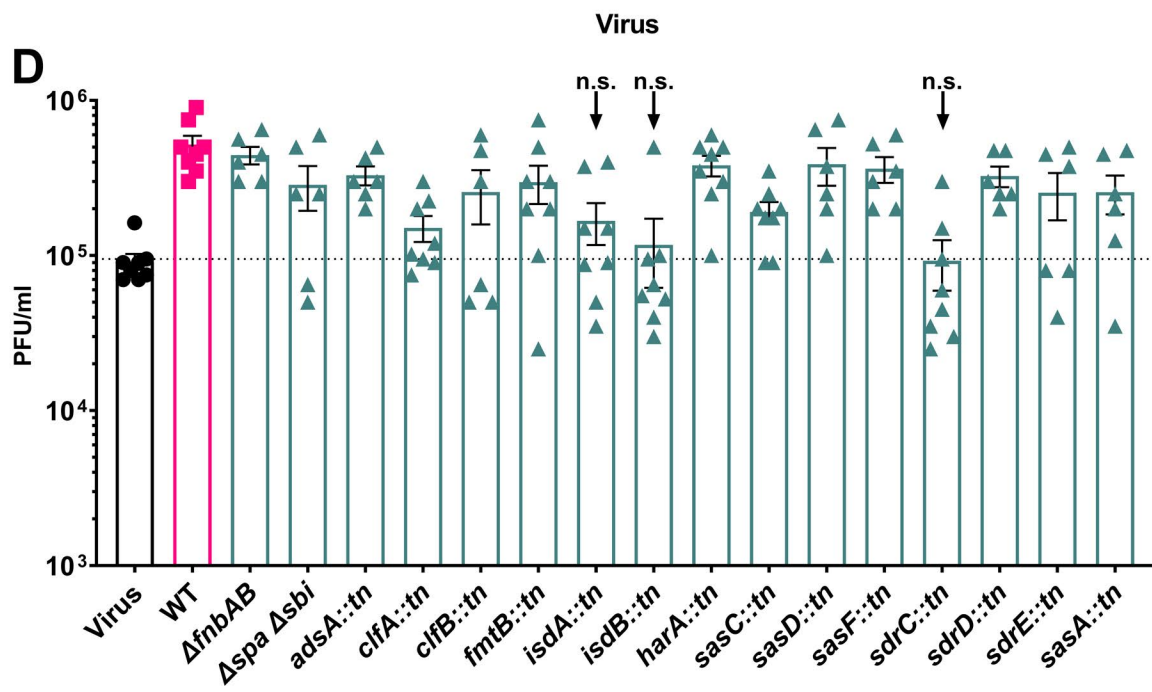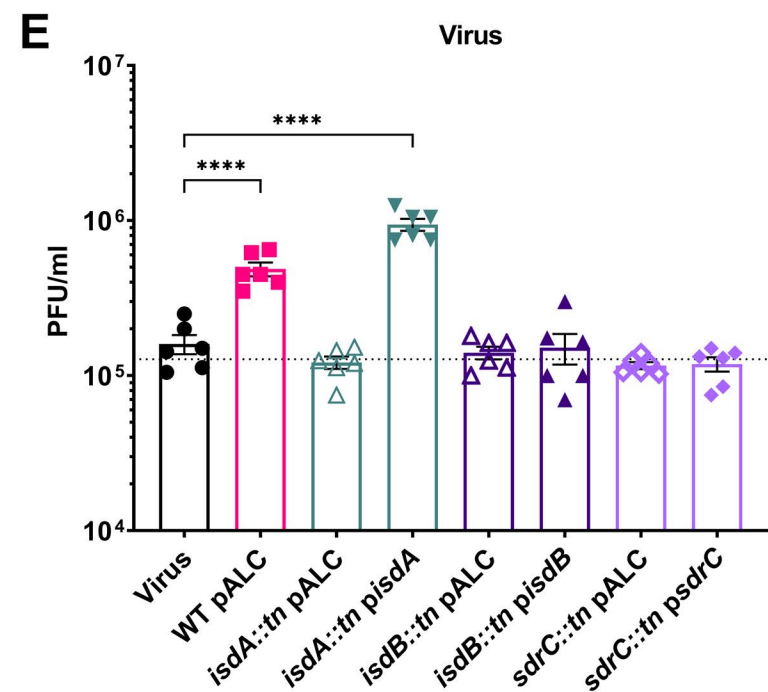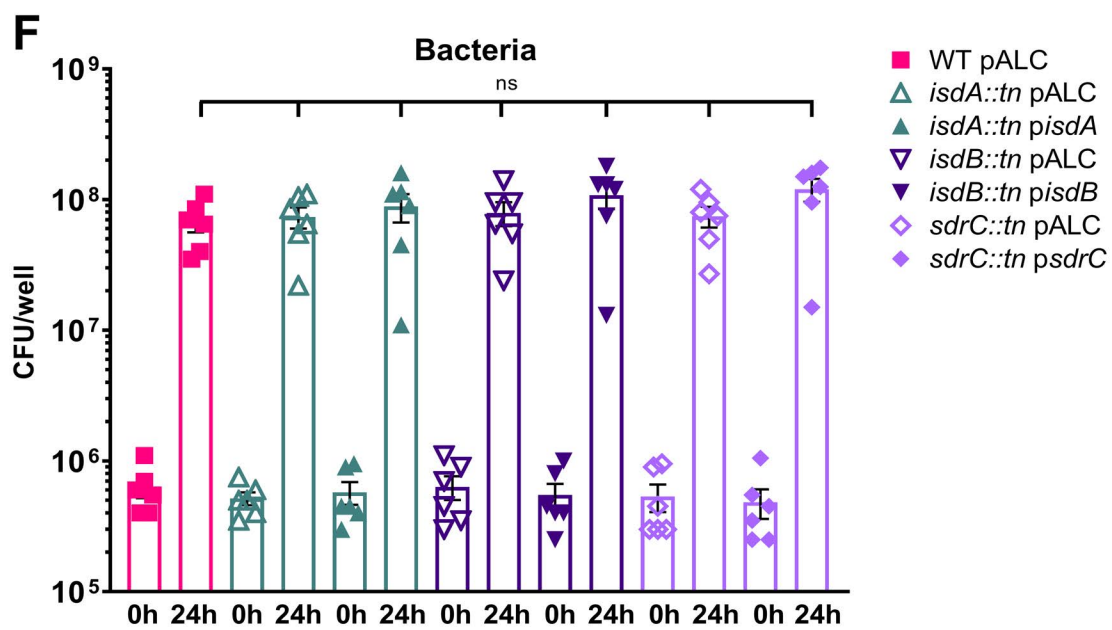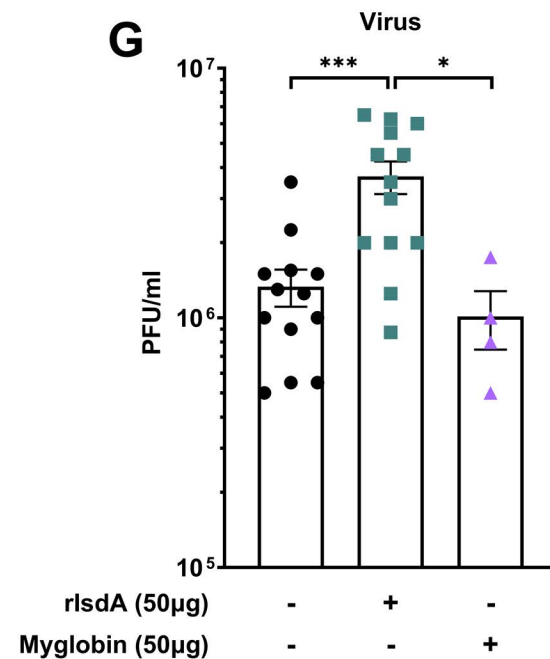

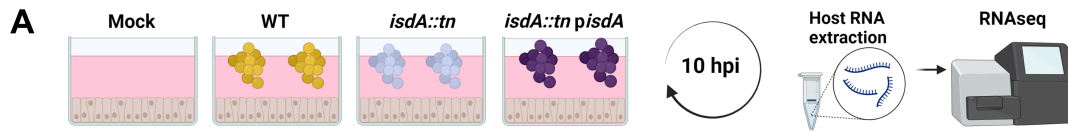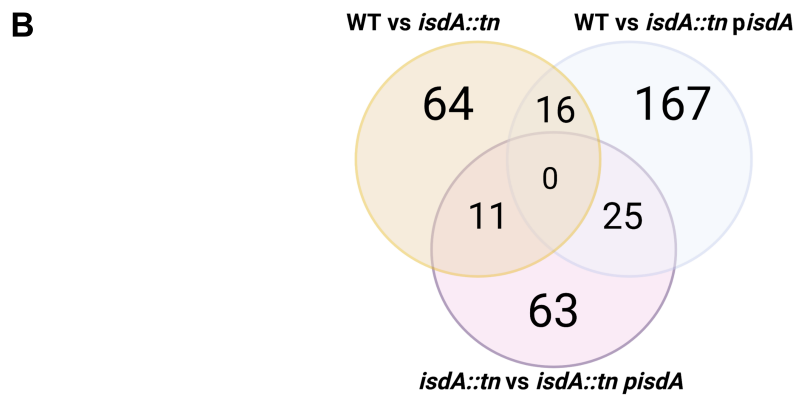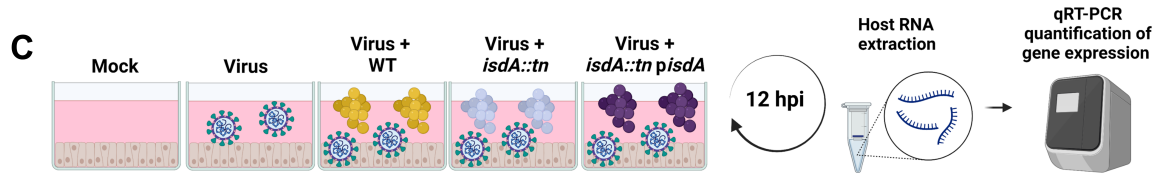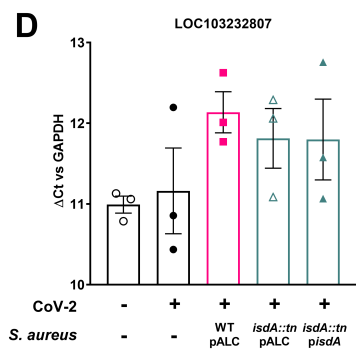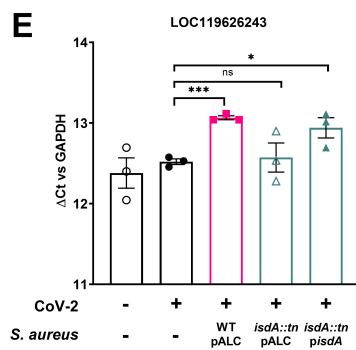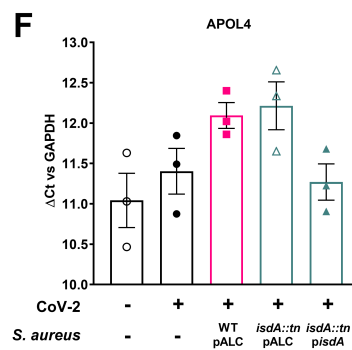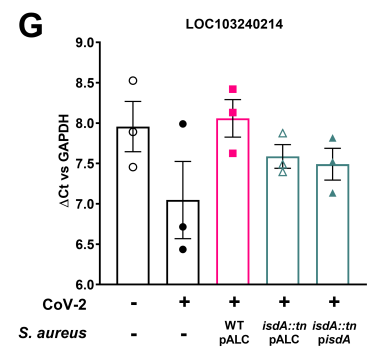

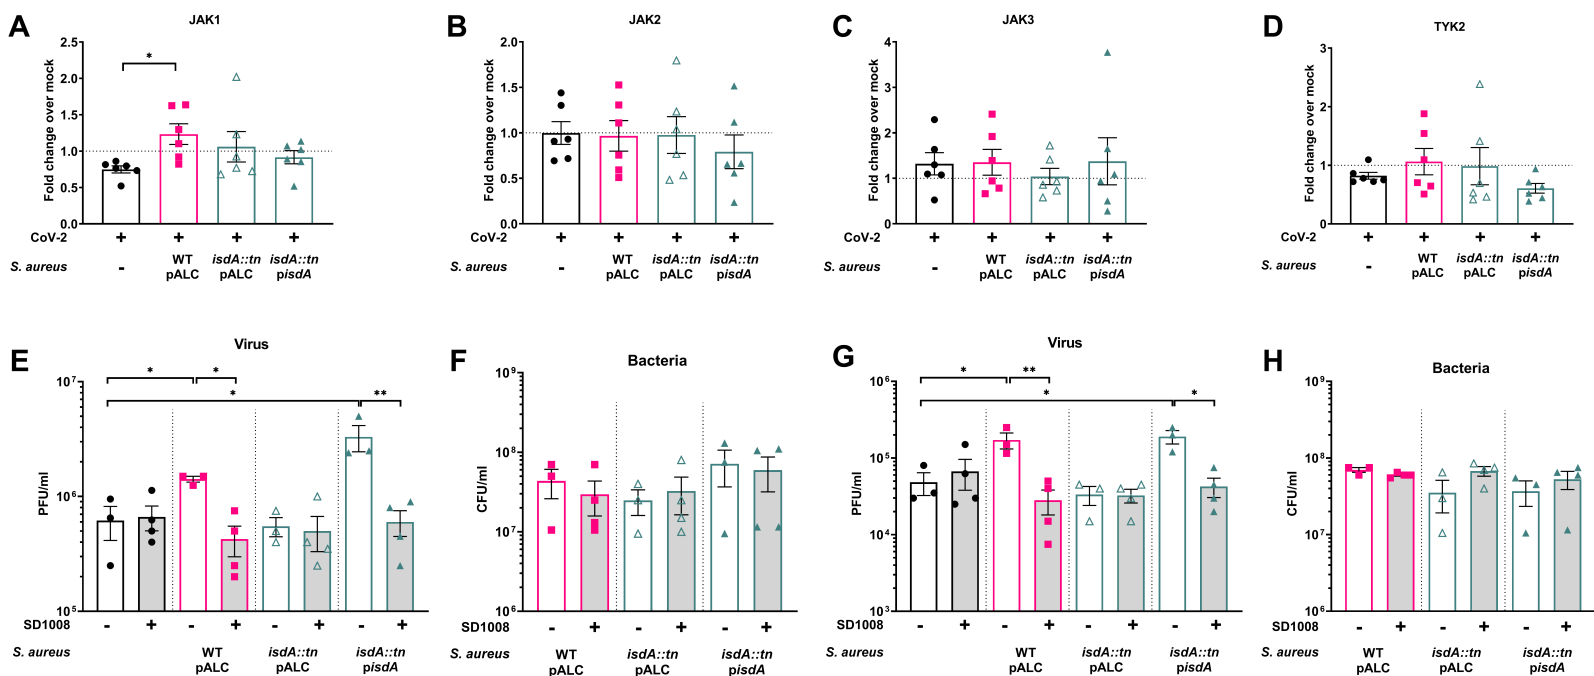

Source: https://www.biorxiv.org/content/10.1101/2022.06.27.497883v1.full.pdf
